# Supplementary material for: Aromaticity of the doubly charged [8]circulenes
Source: Royal Society of Chemistry journal article supplement (doi:10.1039/c6cp00365f), 2016-01-01
Supplement: c6cp00365f1.pdf [file c6cp00365f1.pdf]

## Aromaticity of the doubly charged [8]circulenes

Gleb V. Baryshnikov,<sup>a</sup> Rashid R. Valiev,<sup>b,c</sup> Nataliya N. Karaush,<sup>a</sup>

Dage Sundholm,<sup>d</sup> Boris F. Minaev<sup>a,e</sup>

<sup>a)</sup> Department of Organic Chemistry, Bohdan Khmelnytsky National University, blvd. Shevchenko 81, 18031, Cherkasy, Ukraine

<sup>b)</sup> Tomsk Polytechnic University, 30 Lenin Avenue, 634050, Tomsk, Russia

<sup>c)</sup> Tomsk State University, 36 Lenin Avenue, 634050, Tomsk, Russia

<sup>d)</sup> Department of Chemistry, University of Helsinki, P.O. Box 55 (A.I. Virtanens plats 1), Helsinki FIN-00014, Finland

<sup>e)</sup> Key Laboratory of Engineering Plastics and Beijing National Laboratory for Molecular Science, Institute of Chemistry, Chinese Academy of Science, 100190 Beijing, China

\* Corresponding author. Tel.: +38 0472 376576; fax: +38 0472 354463.

E-mail address: glebchem@rambler.ru (Gleb Baryshnikov)

### Electronic Supplementary Information

#### List of Content

|          |                                                                                                                    |            |
|----------|--------------------------------------------------------------------------------------------------------------------|------------|
| <b>1</b> | <b>Table S1.</b> Total energy of the ground singlet state of <b>1–13</b> circulenes and their doubly charged forms | <b>p.2</b> |
| <b>2</b> | Tables S2–S31. Optimized Cartesian coordinates of the doubly charged forms <b>1–13</b> circulenes.                 | <b>p.3</b> |

**Table S1.** Total energy of the ground singlet state of **1–13** circulenes and their doubly charged forms calculated at the B3LYP/6–311++G(d, p) level of theory

| Compound  | $E_{tot}, a.u.$ |             |             |
|-----------|-----------------|-------------|-------------|
|           | <b>2+</b>       | <b>0</b>    | <b>2–</b>   |
| <b>1</b>  | –1219.9211      | –1220.5974  | –1220.5641  |
| <b>2</b>  | –1372.3413      | –1373.0657  | –1373.1604  |
| <b>3</b>  | –2511.8312      | –2512.4846  | –2512.4550  |
| <b>4</b>  | –10525.1314     | –10525.7640 | –10525.7500 |
| <b>5</b>  | –1140.5524      | –1141.1532  | –1141.0785  |
| <b>6</b>  | –2286.8453      | –2287.4722  | –2287.4502  |
| <b>7</b>  | –9864.8275      | –9865.4397  | –9865.4242  |
| <b>8</b>  | –1073.8595      | –1074.4246  | –1074.4577  |
| <b>9</b>  | –1076.2922      | –1076.9209  | –1074.4577  |
| <b>10</b> | –2079.3454      | –2079.8421  | –2079.9143  |
| <b>11</b> | –9229.2906      | –9229.7951  | –9229.8892  |
| <b>12</b> | –2081.8299      | –2082.4416  | –2082.3986  |
| <b>13</b> | –9231.7554      | –9232.3570  | –9232.3412  |

**Table S2.** The optimized Cartesian coordinates of the dication **1** in the ground singlet state calculated at the B3LYP/6–311++G(d, p) level of theory

| Center Number | Atomic Number | Atomic Type | Coordinates (Angstroms) |           |           |
|---------------|---------------|-------------|-------------------------|-----------|-----------|
|               |               |             | X                       | Y         | Z         |
| 1             | 6             | 0           | 3.438346                | 2.430747  | -0.004671 |
| 2             | 6             | 0           | 2.430710                | 3.438324  | -0.005652 |
| 3             | 6             | 0           | 1.098173                | 3.063856  | -0.006257 |
| 4             | 6             | 0           | 0.692219                | 1.706875  | -0.011794 |
| 5             | 6             | 0           | 1.706965                | 0.692233  | 0.000922  |
| 6             | 6             | 0           | 3.063910                | 1.098182  | -0.004397 |
| 7             | 8             | 0           | 3.881129                | -0.000010 | -0.005219 |
| 8             | 6             | 0           | 3.063898                | -1.098190 | -0.006125 |
| 9             | 6             | 0           | 1.706955                | -0.692198 | -0.011888 |
| 10            | 6             | 0           | 3.438347                | -2.430741 | -0.005970 |
| 11            | 6             | 0           | 2.430706                | -3.438307 | -0.005486 |
| 12            | 1             | 0           | 4.483476                | 2.716564  | -0.006691 |
| 13            | 1             | 0           | 2.716438                | 4.483481  | -0.003562 |
| 14            | 1             | 0           | 4.483495                | -2.716504 | -0.003770 |
| 15            | 1             | 0           | 2.716417                | -4.483468 | -0.007524 |
| 16            | 6             | 0           | 0.692185                | -1.706838 | -0.000224 |
| 17            | 6             | 0           | 1.098188                | -3.063833 | -0.005663 |
| 18            | 8             | 0           | 0.000027                | -3.881053 | -0.006030 |
| 19            | 6             | 0           | -1.098173               | -3.063856 | -0.006257 |
| 20            | 6             | 0           | -0.692219               | -1.706875 | -0.011794 |
| 21            | 6             | 0           | -2.430710               | -3.438324 | -0.005652 |
| 22            | 6             | 0           | -3.438346               | -2.430747 | -0.004671 |
| 23            | 1             | 0           | -2.716438               | -4.483481 | -0.003562 |
| 24            | 1             | 0           | -4.483476               | -2.716564 | -0.006691 |
| 25            | 6             | 0           | -1.706965               | -0.692233 | 0.000922  |
| 26            | 6             | 0           | -3.063910               | -1.098182 | -0.004397 |
| 27            | 8             | 0           | -3.881129               | 0.000010  | -0.005219 |
| 28            | 6             | 0           | -3.063898               | 1.098190  | -0.006125 |
| 29            | 6             | 0           | -1.706955               | 0.692198  | -0.011888 |
| 30            | 6             | 0           | -3.438347               | 2.430741  | -0.005970 |
| 31            | 6             | 0           | -2.430706               | 3.438307  | -0.005486 |
| 32            | 6             | 0           | -1.098188               | 3.063833  | -0.005663 |
| 33            | 6             | 0           | -0.692185               | 1.706838  | -0.000224 |
| 34            | 1             | 0           | -4.483495               | 2.716504  | -0.003770 |
| 35            | 1             | 0           | -2.716417               | 4.483468  | -0.007524 |
| 36            | 8             | 0           | -0.000027               | 3.881053  | -0.006030 |

**Table S3.** The optimized Cartesian coordinates of the dianion **1** in the ground singlet state calculated at the B3LYP/6–311++G(d, p) level of theory

| Center Number | Atomic Number | Atomic Type | Coordinates (Angstroms) |           |          |
|---------------|---------------|-------------|-------------------------|-----------|----------|
|               |               |             | X                       | Y         | Z        |
| 1             | 6             | 0           | 1.134904                | 4.082281  | 0.000000 |
| 2             | 6             | 0           | -0.304758               | 4.226127  | 0.000000 |
| 3             | 6             | 0           | -1.071987               | 3.080501  | 0.000000 |
| 4             | 6             | 0           | -0.537538               | 1.766654  | 0.000000 |
| 5             | 6             | 0           | 0.876457                | 1.625373  | 0.000000 |
| 6             | 6             | 0           | 1.660294                | 2.807501  | 0.000000 |
| 7             | 8             | 0           | 3.017246                | 2.469073  | 0.000000 |
| 8             | 6             | 0           | 3.080501                | 1.071987  | 0.000000 |
| 9             | 6             | 0           | 1.766654                | 0.537538  | 0.000000 |
| 10            | 6             | 0           | 4.226127                | 0.304758  | 0.000000 |
| 11            | 6             | 0           | 4.082281                | -1.134904 | 0.000000 |
| 12            | 1             | 0           | 1.777225                | 4.955868  | 0.000000 |
| 13            | 1             | 0           | -0.761536               | 5.209532  | 0.000000 |
| 14            | 1             | 0           | 5.209532                | 0.761536  | 0.000000 |
| 15            | 1             | 0           | 4.955868                | -1.777225 | 0.000000 |
| 16            | 6             | 0           | 1.625373                | -0.876457 | 0.000000 |
| 17            | 6             | 0           | 2.807501                | -1.660294 | 0.000000 |
| 18            | 8             | 0           | 2.469073                | -3.017246 | 0.000000 |
| 19            | 6             | 0           | 1.071987                | -3.080501 | 0.000000 |
| 20            | 6             | 0           | 0.537538                | -1.766654 | 0.000000 |
| 21            | 6             | 0           | 0.304758                | -4.226127 | 0.000000 |
| 22            | 6             | 0           | -1.134904               | -4.082281 | 0.000000 |
| 23            | 1             | 0           | 0.761536                | -5.209532 | 0.000000 |

|    |   |   |           |           |          |
|----|---|---|-----------|-----------|----------|
| 24 | 1 | 0 | -1.777225 | -4.955868 | 0.000000 |
| 25 | 6 | 0 | -0.876457 | -1.625373 | 0.000000 |
| 26 | 6 | 0 | -1.660294 | -2.807501 | 0.000000 |
| 27 | 8 | 0 | -3.017246 | -2.469073 | 0.000000 |
| 28 | 6 | 0 | -3.080501 | -1.071987 | 0.000000 |
| 29 | 6 | 0 | -1.766654 | -0.537538 | 0.000000 |
| 30 | 6 | 0 | -4.226127 | -0.304758 | 0.000000 |
| 31 | 6 | 0 | -4.082281 | 1.134904  | 0.000000 |
| 32 | 6 | 0 | -2.807501 | 1.660294  | 0.000000 |
| 33 | 6 | 0 | -1.625373 | 0.876457  | 0.000000 |
| 34 | 1 | 0 | -5.209532 | -0.761536 | 0.000000 |
| 35 | 1 | 0 | -4.955868 | 1.777225  | 0.000000 |
| 36 | 8 | 0 | -2.469073 | 3.017246  | 0.000000 |

**Table S4.** The optimized Cartesian coordinates of the dication **2** in the ground singlet state calculated at the B3LYP/6-311++G(d, p) level of theory

| Center Number | Atomic Number | Atomic Type | Coordinates (Angstroms) |           |          |
|---------------|---------------|-------------|-------------------------|-----------|----------|
|               |               |             | X                       | Y         | Z        |
| 1             | 6             | 0           | 1.363210                | 3.027528  | 0.004736 |
| 2             | 6             | 0           | 0.722089                | 1.742801  | 0.004281 |
| 3             | 6             | 0           | -0.722091               | 1.742801  | 0.003362 |
| 4             | 6             | 0           | -1.742801               | 0.722091  | 0.003362 |
| 5             | 6             | 0           | -3.027531               | 1.363212  | 0.002363 |
| 6             | 6             | 0           | -1.363212               | 3.027531  | 0.002363 |
| 7             | 6             | 0           | -1.742801               | -0.722089 | 0.004281 |
| 8             | 6             | 0           | -2.842083               | 2.842083  | 0.001666 |
| 9             | 6             | 0           | -3.027528               | -1.363210 | 0.004736 |
| 10            | 6             | 0           | -0.710400               | 4.230935  | 0.002819 |
| 11            | 6             | 0           | 0.710399                | 4.230933  | 0.004195 |
| 12            | 6             | 0           | -4.230933               | -0.710399 | 0.004195 |
| 13            | 6             | 0           | -4.230935               | 0.710400  | 0.002819 |
| 14            | 1             | 0           | -1.278445               | 5.155614  | 0.002127 |
| 15            | 1             | 0           | 1.278447                | 5.155611  | 0.004507 |
| 16            | 1             | 0           | -5.155611               | -1.278447 | 0.004507 |
| 17            | 1             | 0           | -5.155614               | 1.278445  | 0.002127 |
| 18            | 6             | 0           | 1.742801                | 0.722089  | 0.004281 |
| 19            | 6             | 0           | 3.027528                | 1.363210  | 0.004736 |
| 20            | 6             | 0           | 1.742801                | -0.722091 | 0.003362 |
| 21            | 6             | 0           | 0.722091                | -1.742801 | 0.003362 |
| 22            | 6             | 0           | -0.722089               | -1.742801 | 0.004281 |
| 23            | 6             | 0           | 3.027531                | -1.363212 | 0.002363 |
| 24            | 6             | 0           | 1.363212                | -3.027531 | 0.002363 |
| 25            | 6             | 0           | -1.363210               | -3.027528 | 0.004736 |
| 26            | 6             | 0           | 4.230935                | -0.710400 | 0.002819 |
| 27            | 6             | 0           | 4.230933                | 0.710399  | 0.004195 |
| 28            | 6             | 0           | -0.710399               | -4.230933 | 0.004195 |
| 29            | 6             | 0           | 0.710400                | -4.230935 | 0.002819 |
| 30            | 1             | 0           | 5.155614                | -1.278445 | 0.002127 |
| 31            | 1             | 0           | 5.155611                | 1.278447  | 0.004507 |
| 32            | 1             | 0           | -1.278447               | -5.155611 | 0.004507 |
| 33            | 1             | 0           | 1.278445                | -5.155614 | 0.002127 |
| 34            | 6             | 0           | 2.842083                | -2.842083 | 0.001666 |
| 35            | 6             | 0           | 2.842081                | 2.842081  | 0.005134 |
| 36            | 6             | 0           | -2.842081               | -2.842081 | 0.005134 |
| 37            | 8             | 0           | -3.690905               | -3.690905 | 0.006381 |
| 38            | 8             | 0           | 3.690908                | -3.690908 | 0.000038 |
| 39            | 8             | 0           | 3.690905                | 3.690905  | 0.006381 |
| 40            | 8             | 0           | -3.690908               | 3.690908  | 0.000038 |

**Table S5.** The optimized Cartesian coordinates of the dianion **2** in the ground singlet state calculated at the B3LYP/6-311++G(d, p) level of theory

| Center Number | Atomic Number | Atomic Type | Coordinates (Angstroms) |           |          |
|---------------|---------------|-------------|-------------------------|-----------|----------|
|               |               |             | X                       | Y         | Z        |
| 1             | 6             | 0           | 2.385470                | -2.293170 | 0.006406 |
| 2             | 6             | 0           | 1.289510                | -1.367261 | 0.010170 |
| 3             | 6             | 0           | 0.000068                | -1.879423 | 0.001921 |

|    |   |   |           |           |          |
|----|---|---|-----------|-----------|----------|
| 4  | 6 | 0 | -1.367246 | -1.289491 | 0.010201 |
| 5  | 6 | 0 | -2.293155 | -2.385463 | 0.006506 |
| 6  | 6 | 0 | -0.161959 | -3.304976 | 0.005403 |
| 7  | 6 | 0 | -1.879407 | -0.000059 | 0.002116 |
| 8  | 6 | 0 | -1.579375 | -3.660644 | 0.005894 |
| 9  | 6 | 0 | -3.304967 | 0.161974  | 0.005778 |
| 10 | 6 | 0 | 0.919768  | -4.192393 | 0.005417 |
| 11 | 6 | 0 | 2.207414  | -3.680959 | 0.006077 |
| 12 | 6 | 0 | -4.192378 | -0.919753 | 0.005912 |
| 13 | 6 | 0 | -3.680940 | -2.207403 | 0.006486 |
| 14 | 1 | 0 | 0.721315  | -5.259348 | 0.005771 |
| 15 | 1 | 0 | 3.083838  | -4.320999 | 0.005473 |
| 16 | 1 | 0 | -5.259334 | -0.721309 | 0.006527 |
| 17 | 1 | 0 | -4.320982 | -3.083828 | 0.005897 |
| 18 | 6 | 0 | 1.879445  | 0.000054  | 0.002118 |
| 19 | 6 | 0 | 3.305003  | -0.161977 | 0.005779 |
| 20 | 6 | 0 | 1.367282  | 1.289487  | 0.010202 |
| 21 | 6 | 0 | -0.000031 | 1.879419  | 0.001921 |
| 22 | 6 | 0 | -1.289473 | 1.367257  | 0.010170 |
| 23 | 6 | 0 | 2.293192  | 2.385457  | 0.006507 |
| 24 | 6 | 0 | 0.161997  | 3.304972  | 0.005404 |
| 25 | 6 | 0 | -2.385434 | 2.293165  | 0.006405 |
| 26 | 6 | 0 | 3.680977  | 2.207398  | 0.006486 |
| 27 | 6 | 0 | 4.192415  | 0.919749  | 0.005913 |
| 28 | 6 | 0 | -2.207377 | 3.680954  | 0.006077 |
| 29 | 6 | 0 | -0.919732 | 4.192388  | 0.005417 |
| 30 | 1 | 0 | 4.321016  | 3.083825  | 0.005897 |
| 31 | 1 | 0 | 5.259371  | 0.721303  | 0.006528 |
| 32 | 1 | 0 | -3.083801 | 4.320994  | 0.005473 |
| 33 | 1 | 0 | -0.721281 | 5.259343  | 0.005771 |
| 34 | 6 | 0 | 1.579412  | 3.660639  | 0.005895 |
| 35 | 6 | 0 | 3.660665  | -1.579396 | 0.006112 |
| 36 | 6 | 0 | -3.660628 | 1.579391  | 0.006110 |
| 37 | 8 | 0 | -4.805590 | 2.073404  | 0.006145 |
| 38 | 8 | 0 | 2.073414  | 4.805613  | 0.005785 |
| 39 | 8 | 0 | 4.805627  | -2.073407 | 0.006145 |
| 40 | 8 | 0 | -2.073375 | -4.805619 | 0.005785 |

**Table S6.** The optimized Cartesian coordinates of the dication **3** in the ground singlet state calculated at the B3LYP/6–311++G(d, p) level of theory

| Center Number | Atomic Number | Atomic Type | Coordinates (Angstroms) |           |           |
|---------------|---------------|-------------|-------------------------|-----------|-----------|
|               |               |             | X                       | Y         | Z         |
| 1             | 6             | 0           | -1.098560               | 3.087809  | 0.469401  |
| 2             | 6             | 0           | -2.993122               | 1.335149  | -0.469401 |
| 3             | 16            | 0           | -4.197879               | 0.163326  | -0.875520 |
| 4             | 1             | 0           | 4.562320                | 2.661370  | -0.478141 |
| 5             | 1             | 0           | 3.007799                | 4.341751  | 0.478141  |
| 6             | 6             | 0           | 3.087809                | 1.098560  | -0.469401 |
| 7             | 16            | 0           | 4.197879                | -0.163326 | -0.875520 |
| 8             | 6             | 0           | 2.993122                | -1.335149 | -0.469401 |
| 9             | 6             | 0           | 1.695680                | -0.770942 | -0.177005 |
| 10            | 6             | 0           | 1.750454                | 0.636864  | -0.177005 |
| 11            | 6             | 0           | 3.533333                | 2.393859  | -0.268605 |
| 12            | 6             | 0           | 2.661148                | 3.336659  | 0.268605  |
| 13            | 6             | 0           | 1.335149                | 2.993122  | 0.469401  |
| 14            | 6             | 0           | 0.770942                | 1.695680  | 0.177005  |
| 15            | 6             | 0           | 3.336659                | -2.661148 | -0.268605 |
| 16            | 6             | 0           | 2.393859                | -3.533333 | 0.268605  |
| 17            | 6             | 0           | 1.098560                | -3.087809 | 0.469401  |
| 18            | 6             | 0           | 0.636864                | -1.750454 | 0.177005  |
| 19            | 1             | 0           | 2.661370                | -4.562320 | 0.478141  |
| 20            | 1             | 0           | 4.341751                | -3.007799 | -0.478141 |
| 21            | 6             | 0           | -0.636864               | 1.750454  | 0.177005  |
| 22            | 6             | 0           | -1.695680               | 0.770942  | -0.177005 |
| 23            | 6             | 0           | -1.750454               | -0.636864 | -0.177005 |
| 24            | 6             | 0           | -0.770942               | -1.695680 | 0.177005  |
| 25            | 6             | 0           | -1.335149               | -2.993122 | 0.469401  |
| 26            | 6             | 0           | -2.661148               | -3.336659 | 0.268605  |
| 27            | 6             | 0           | -3.533333               | -2.393859 | -0.268605 |
| 28            | 6             | 0           | -3.087809               | -1.098560 | -0.469401 |
| 29            | 1             | 0           | -4.562320               | -2.661370 | -0.478141 |

|    |    |   |           |           |           |
|----|----|---|-----------|-----------|-----------|
| 30 | 1  | 0 | -3.007799 | -4.341751 | 0.478141  |
| 31 | 16 | 0 | -0.163326 | -4.197879 | 0.875520  |
| 32 | 16 | 0 | 0.163326  | 4.197879  | 0.875520  |
| 33 | 6  | 0 | -2.393859 | 3.533333  | 0.268605  |
| 34 | 6  | 0 | -3.336659 | 2.661148  | -0.268605 |
| 35 | 1  | 0 | -2.661370 | 4.562320  | 0.478141  |
| 36 | 1  | 0 | -4.341751 | 3.007799  | -0.478141 |

**Table S7.** The optimized Cartesian coordinates of the dianion **3** in the ground singlet state calculated at the B3LYP/6-311++G(d, p) level of theory

| Center Number | Atomic Number | Atomic Type | Coordinates (Angstroms) |           |           |
|---------------|---------------|-------------|-------------------------|-----------|-----------|
|               |               |             | X                       | Y         | Z         |
| 1             | 6             | 0           | -1.294335               | 3.032163  | 0.434326  |
| 2             | 6             | 0           | -3.068740               | 1.205054  | -0.434326 |
| 3             | 16            | 0           | -4.187871               | -0.061286 | -0.931352 |
| 4             | 1             | 0           | 4.466676                | 2.886694  | -0.435374 |
| 5             | 1             | 0           | 2.754754                | 4.549234  | 0.435374  |
| 6             | 6             | 0           | 3.032163                | 1.294335  | -0.434326 |
| 7             | 16            | 0           | 4.187871                | 0.061286  | -0.931352 |
| 8             | 6             | 0           | 3.068740                | -1.205054 | -0.434326 |
| 9             | 6             | 0           | 1.742233                | -0.694363 | -0.159897 |
| 10            | 6             | 0           | 1.721169                | 0.745047  | -0.159897 |
| 11            | 6             | 0           | 3.438481                | 2.594256  | -0.249426 |
| 12            | 6             | 0           | 2.492528                | 3.512922  | 0.249426  |
| 13            | 6             | 0           | 1.205054                | 3.068740  | 0.434326  |
| 14            | 6             | 0           | 0.694363                | 1.742233  | 0.159897  |
| 15            | 6             | 0           | 3.512922                | -2.492528 | -0.249426 |
| 16            | 6             | 0           | 2.594256                | -3.438481 | 0.249426  |
| 17            | 6             | 0           | 1.294335                | -3.032163 | 0.434326  |
| 18            | 6             | 0           | 0.745047                | -1.721169 | 0.159897  |
| 19            | 1             | 0           | 2.886694                | -4.466676 | 0.435374  |
| 20            | 1             | 0           | 4.549234                | -2.754754 | -0.435374 |
| 21            | 6             | 0           | -0.745047               | 1.721169  | 0.159897  |
| 22            | 6             | 0           | -1.742233               | 0.694363  | -0.159897 |
| 23            | 6             | 0           | -1.721169               | -0.745047 | -0.159897 |
| 24            | 6             | 0           | -0.694363               | -1.742233 | 0.159897  |
| 25            | 6             | 0           | -1.205054               | -3.068740 | 0.434326  |
| 26            | 6             | 0           | -2.492528               | -3.512922 | 0.249426  |
| 27            | 6             | 0           | -3.438481               | -2.594256 | -0.249426 |
| 28            | 6             | 0           | -3.032163               | -1.294335 | -0.434326 |
| 29            | 1             | 0           | -4.466676               | -2.886694 | -0.435374 |
| 30            | 1             | 0           | -2.754754               | -4.549234 | 0.435374  |
| 31            | 16            | 0           | 0.061286                | -4.187871 | 0.931352  |
| 32            | 16            | 0           | -0.061286               | 4.187871  | 0.931352  |
| 33            | 6             | 0           | -2.594256               | 3.438481  | 0.249426  |
| 34            | 6             | 0           | -3.512922               | 2.492528  | -0.249426 |
| 35            | 1             | 0           | -2.886694               | 4.466676  | 0.435374  |
| 36            | 1             | 0           | -4.549234               | 2.754754  | -0.435374 |

**Table S8.** The optimized Cartesian coordinates of the dication **4** in the ground singlet state calculated at the B3LYP/6-311++G(d, p) level of theory

| Center Number | Atomic Number | Atomic Type | Coordinates (Angstroms) |           |           |
|---------------|---------------|-------------|-------------------------|-----------|-----------|
|               |               |             | X                       | Y         | Z         |
| 1             | 6             | 0           | 0.609448                | 1.714015  | 0.276410  |
| 2             | 34            | 0           | -4.123461               | -0.229081 | -1.427266 |
| 3             | 1             | 0           | -2.657087               | -4.477004 | 0.717392  |
| 4             | 1             | 0           | -4.155130               | -3.136650 | -0.717392 |
| 5             | 34            | 0           | 0.229081                | -4.123461 | 1.427266  |
| 6             | 6             | 0           | 1.422858                | -2.858559 | 0.716401  |
| 7             | 6             | 0           | -1.097461               | -2.998577 | 0.716401  |
| 8             | 6             | 0           | -2.352708               | -3.485256 | 0.404358  |
| 9             | 6             | 0           | -3.203200               | -2.724289 | -0.404358 |

|    |    |   |           |           |           |
|----|----|---|-----------|-----------|-----------|
| 10 | 6  | 0 | -0.609448 | -1.714015 | 0.276410  |
| 11 | 6  | 0 | 0.795558  | -1.635959 | 0.276410  |
| 12 | 6  | 0 | 2.724289  | -3.203200 | 0.404358  |
| 13 | 1  | 0 | 3.136650  | -4.155130 | 0.717392  |
| 14 | 6  | 0 | -2.858559 | -1.422858 | -0.716401 |
| 15 | 6  | 0 | -1.635959 | -0.795558 | -0.276410 |
| 16 | 6  | 0 | -1.714015 | 0.609448  | -0.276410 |
| 17 | 6  | 0 | -2.998577 | 1.097461  | -0.716401 |
| 18 | 6  | 0 | -3.485256 | 2.352708  | -0.404358 |
| 19 | 6  | 0 | -2.724289 | 3.203200  | 0.404358  |
| 20 | 6  | 0 | -1.422858 | 2.858559  | 0.716401  |
| 21 | 6  | 0 | -0.795558 | 1.635959  | 0.276410  |
| 22 | 1  | 0 | -3.136650 | 4.155130  | 0.717392  |
| 23 | 1  | 0 | -4.477004 | 2.657087  | -0.717392 |
| 24 | 34 | 0 | -0.229081 | 4.123461  | 1.427266  |
| 25 | 6  | 0 | 1.097461  | 2.998577  | 0.716401  |
| 26 | 6  | 0 | 2.352708  | 3.485256  | 0.404358  |
| 27 | 6  | 0 | 3.203200  | 2.724289  | -0.404358 |
| 28 | 6  | 0 | 2.858559  | 1.422858  | -0.716401 |
| 29 | 6  | 0 | 1.635959  | 0.795558  | -0.276410 |
| 30 | 6  | 0 | 1.714015  | -0.609448 | -0.276410 |
| 31 | 6  | 0 | 2.998577  | -1.097461 | -0.716401 |
| 32 | 34 | 0 | 4.123461  | 0.229081  | -1.427266 |
| 33 | 1  | 0 | 4.155130  | 3.136650  | -0.717392 |
| 34 | 1  | 0 | 2.657087  | 4.477004  | 0.717392  |
| 35 | 6  | 0 | 3.485256  | -2.352708 | -0.404358 |
| 36 | 1  | 0 | 4.477004  | -2.657087 | -0.717392 |

**Table S9.** The optimized Cartesian coordinates of the dianion **4** in the ground singlet state calculated at the B3LYP/6-311++G(d, p) level of theory

| Center Number | Atomic Number | Atomic Type | Coordinates (Angstroms) |           |           |
|---------------|---------------|-------------|-------------------------|-----------|-----------|
|               |               |             | X                       | Y         | Z         |
| 1             | 6             | 0           | 0.370969                | 1.808118  | 0.238981  |
| 2             | 34            | 0           | -4.041932               | -0.808386 | -1.443729 |
| 3             | 1             | 0           | -1.954939               | -4.888206 | 0.651628  |
| 4             | 1             | 0           | -3.760291               | -3.684639 | -0.651628 |
| 5             | 34            | 0           | 0.808386                | -4.041932 | 1.443729  |
| 6             | 6             | 0           | 1.847540                | -2.654390 | 0.643258  |
| 7             | 6             | 0           | -0.684502               | -3.160798 | 0.643258  |
| 8             | 6             | 0           | -1.840707               | -3.847195 | 0.368919  |
| 9             | 6             | 0           | -2.843293               | -3.178804 | -0.368919 |
| 10            | 6             | 0           | -0.370969               | -1.808118 | 0.238981  |
| 11            | 6             | 0           | 1.037863                | -1.526352 | 0.238981  |
| 12            | 6             | 0           | 3.178804                | -2.843293 | 0.368919  |
| 13            | 1             | 0           | 3.684639                | -3.760291 | 0.651628  |
| 14            | 6             | 0           | -2.654390               | -1.847540 | -0.643258 |
| 15            | 6             | 0           | -1.526352               | -1.037863 | -0.238981 |
| 16            | 6             | 0           | -1.808118               | 0.370969  | -0.238981 |
| 17            | 6             | 0           | -3.160798               | 0.684502  | -0.643258 |
| 18            | 6             | 0           | -3.847195               | 1.840707  | -0.368919 |
| 19            | 6             | 0           | -3.178804               | 2.843293  | 0.368919  |
| 20            | 6             | 0           | -1.847540               | 2.654390  | 0.643258  |
| 21            | 6             | 0           | -1.037863               | 1.526352  | 0.238981  |
| 22            | 1             | 0           | -3.684639               | 3.760291  | 0.651628  |
| 23            | 1             | 0           | -4.888206               | 1.954939  | -0.651628 |
| 24            | 34            | 0           | -0.808386               | 4.041932  | 1.443729  |
| 25            | 6             | 0           | 0.684502                | 3.160798  | 0.643258  |
| 26            | 6             | 0           | 1.840707                | 3.847195  | 0.368919  |
| 27            | 6             | 0           | 2.843293                | 3.178804  | -0.368919 |
| 28            | 6             | 0           | 2.654390                | 1.847540  | -0.643258 |
| 29            | 6             | 0           | 1.526352                | 1.037863  | -0.238981 |
| 30            | 6             | 0           | 1.808118                | -0.370969 | -0.238981 |
| 31            | 6             | 0           | 3.160798                | -0.684502 | -0.643258 |
| 32            | 34            | 0           | 4.041932                | 0.808386  | -1.443729 |
| 33            | 1             | 0           | 3.760291                | 3.684639  | -0.651628 |
| 34            | 1             | 0           | 1.954939                | 4.888206  | 0.651628  |
| 35            | 6             | 0           | 3.847195                | -1.840707 | -0.368919 |
| 36            | 1             | 0           | 4.888206                | -1.954939 | -0.651628 |

**Table S10.** The optimized Cartesian coordinates of the dication **5** in the ground singlet state calculated at the B3LYP/6-311++G(d, p) level of theory

| Center Number | Atomic Number | Atomic Type | Coordinates (Angstroms) |           |          |
|---------------|---------------|-------------|-------------------------|-----------|----------|
|               |               |             | X                       | Y         | Z        |
| 1             | 6             | 0           | -0.390195               | 1.815023  | 0.000000 |
| 2             | 6             | 0           | -0.520823               | 3.237874  | 0.000000 |
| 3             | 6             | 0           | 1.719816                | 2.792368  | 0.000000 |
| 4             | 6             | 0           | 1.054830                | 1.527708  | 0.000000 |
| 5             | 6             | 0           | 1.815023                | 0.390195  | 0.000000 |
| 6             | 6             | 0           | 1.527708                | -1.054830 | 0.000000 |
| 7             | 6             | 0           | 2.792368                | -1.719816 | 0.000000 |
| 8             | 6             | 0           | 3.237874                | 0.520823  | 0.000000 |
| 9             | 6             | 0           | 0.390195                | -1.815023 | 0.000000 |
| 10            | 6             | 0           | -1.527708               | 1.054830  | 0.000000 |
| 11            | 6             | 0           | -1.815023               | -0.390195 | 0.000000 |
| 12            | 6             | 0           | -1.054830               | -1.527708 | 0.000000 |
| 13            | 7             | 0           | 3.765134                | -0.748621 | 0.000000 |
| 14            | 7             | 0           | 0.748621                | 3.765134  | 0.000000 |
| 15            | 6             | 0           | -2.792368               | 1.719816  | 0.000000 |
| 16            | 6             | 0           | -3.237874               | -0.520823 | 0.000000 |
| 17            | 6             | 0           | 0.520823                | -3.237874 | 0.000000 |
| 18            | 7             | 0           | -0.748621               | -3.765134 | 0.000000 |
| 19            | 6             | 0           | -1.719816               | -2.792368 | 0.000000 |
| 20            | 6             | 0           | 3.888599                | 1.765822  | 0.000000 |
| 21            | 6             | 0           | 3.119046                | 2.917341  | 0.000000 |
| 22            | 6             | 0           | 1.765822                | -3.888599 | 0.000000 |
| 23            | 6             | 0           | 2.917341                | -3.119046 | 0.000000 |
| 24            | 6             | 0           | -2.917341               | 3.119046  | 0.000000 |
| 25            | 6             | 0           | -1.765822               | 3.888599  | 0.000000 |
| 26            | 6             | 0           | -3.119046               | -2.917341 | 0.000000 |
| 27            | 6             | 0           | -3.888599               | -1.765822 | 0.000000 |
| 28            | 1             | 0           | 4.969481                | 1.831090  | 0.000000 |
| 29            | 1             | 0           | 3.592828                | 3.891044  | 0.000000 |
| 30            | 1             | 0           | 1.831090                | -4.969481 | 0.000000 |
| 31            | 1             | 0           | 3.891044                | -3.592828 | 0.000000 |
| 32            | 1             | 0           | -3.891044               | 3.592828  | 0.000000 |
| 33            | 1             | 0           | -1.831090               | 4.969481  | 0.000000 |
| 34            | 1             | 0           | -3.592828               | -3.891044 | 0.000000 |
| 35            | 1             | 0           | -4.969481               | -1.831090 | 0.000000 |
| 36            | 1             | 0           | -0.946420               | -4.759948 | 0.000000 |
| 37            | 1             | 0           | 0.946420                | 4.759948  | 0.000000 |
| 38            | 7             | 0           | -3.765134               | 0.748621  | 0.000000 |
| 39            | 1             | 0           | -4.759948               | 0.946420  | 0.000000 |
| 40            | 1             | 0           | 4.759948                | -0.946420 | 0.000000 |

**Table S11.** The optimized Cartesian coordinates of the dianion **5** in the ground singlet state calculated at the B3LYP/6-311++G(d, p) level of theory

| Center Number | Atomic Number | Atomic Type | Coordinates (Angstroms) |           |          |
|---------------|---------------|-------------|-------------------------|-----------|----------|
|               |               |             | X                       | Y         | Z        |
| 1             | 6             | 0           | 0.069043                | 3.081376  | 1.139655 |
| 2             | 6             | 0           | 0.034991                | 1.720219  | 0.714905 |
| 3             | 6             | 0           | -0.007571               | 0.715344  | 1.719315 |
| 4             | 6             | 0           | 0.007201                | -0.714405 | 1.719317 |
| 5             | 6             | 0           | -0.036483               | -1.139621 | 3.080026 |
| 6             | 6             | 0           | -0.060016               | 1.139570  | 3.080019 |
| 7             | 6             | 0           | 0.070505                | -1.718192 | 0.714912 |
| 8             | 7             | 0           | -0.153889               | -0.001119 | 3.888039 |
| 9             | 6             | 0           | 0.132675                | -3.078337 | 1.139660 |
| 10            | 6             | 0           | -0.043569               | 2.474429  | 3.472962 |
| 11            | 6             | 0           | 0.034835                | 3.473990  | 2.474285 |
| 12            | 6             | 0           | 0.106569                | -3.471576 | 2.474278 |
| 13            | 6             | 0           | 0.007510                | -2.473857 | 3.472969 |
| 14            | 1             | 0           | -0.106134               | 2.747538  | 4.522024 |
| 15            | 1             | 0           | 0.083758                | 4.523610  | 2.748035 |
| 16            | 1             | 0           | 0.177202                | -4.519961 | 2.748018 |



|    |   |   |           |           |           |
|----|---|---|-----------|-----------|-----------|
| 17 | 1 | 0 | -0.049414 | -2.748203 | 4.522029  |
| 18 | 1 | 0 | 0.179811  | 0.002327  | 4.838966  |
| 19 | 6 | 0 | 0.034991  | 1.720219  | -0.714905 |
| 20 | 6 | 0 | 0.069043  | 3.081376  | -1.139655 |
| 21 | 6 | 0 | -0.007571 | 0.715344  | -1.719315 |
| 22 | 6 | 0 | 0.007201  | -0.714405 | -1.719317 |
| 23 | 6 | 0 | 0.070505  | -1.718192 | -0.714912 |
| 24 | 6 | 0 | -0.060016 | 1.139570  | -3.080019 |
| 25 | 6 | 0 | -0.036483 | -1.139621 | -3.080026 |
| 26 | 6 | 0 | 0.132675  | -3.078337 | -1.139660 |
| 27 | 6 | 0 | -0.043569 | 2.474429  | -3.472962 |
| 28 | 6 | 0 | 0.034835  | 3.473990  | -2.474285 |
| 29 | 6 | 0 | 0.106569  | -3.471576 | -2.474278 |
| 30 | 6 | 0 | 0.007510  | -2.473857 | -3.472969 |
| 31 | 1 | 0 | -0.106134 | 2.747538  | -4.522024 |
| 32 | 1 | 0 | 0.083758  | 4.523610  | -2.748035 |
| 33 | 1 | 0 | 0.177202  | -4.519961 | -2.748018 |
| 34 | 1 | 0 | -0.049414 | -2.748203 | -4.522029 |
| 35 | 7 | 0 | -0.153889 | -0.001119 | -3.888039 |
| 36 | 1 | 0 | 0.179811  | 0.002327  | -4.838966 |
| 37 | 7 | 0 | 0.166145  | 3.890306  | 0.000000  |
| 38 | 7 | 0 | 0.246638  | -3.885172 | 0.000000  |
| 39 | 1 | 0 | -0.175810 | 4.838283  | 0.000000  |
| 40 | 1 | 0 | -0.076717 | -4.839669 | 0.000000  |

**Table S12.** The optimized Cartesian coordinates of the dication **6** in the ground singlet state calculated at the B3LYP/6–311++G(d, p) level of theory

| Center Number | Atomic Number | Atomic Type | Coordinates (Angstroms) |           |           |
|---------------|---------------|-------------|-------------------------|-----------|-----------|
|               |               |             | X                       | Y         | Z         |
| 1             | 6             | 0           | -1.247866               | 2.923454  | 0.735116  |
| 2             | 15            | 0           | 0.000000                | 3.935747  | 1.595181  |
| 3             | 6             | 0           | -0.709102               | 1.666324  | 0.281688  |
| 4             | 6             | 0           | 0.709102                | 1.666324  | 0.281688  |
| 5             | 6             | 0           | 1.247866                | 2.923454  | 0.735116  |
| 6             | 6             | 0           | -1.666324               | 0.709102  | -0.281688 |
| 7             | 6             | 0           | -1.666324               | -0.709102 | -0.281688 |
| 8             | 6             | 0           | -0.709102               | -1.666324 | 0.281688  |
| 9             | 6             | 0           | 0.709102                | -1.666324 | 0.281688  |
| 10            | 6             | 0           | 1.666324                | -0.709102 | -0.281688 |
| 11            | 6             | 0           | 1.666324                | 0.709102  | -0.281688 |
| 12            | 6             | 0           | 2.923454                | 1.247866  | -0.735116 |
| 13            | 6             | 0           | 2.923454                | -1.247866 | -0.735116 |
| 14            | 15            | 0           | 3.935747                | 0.000000  | -1.595181 |
| 15            | 6             | 0           | 3.324798                | 2.527417  | -0.424550 |
| 16            | 6             | 0           | 2.527417                | 3.324798  | 0.424550  |
| 17            | 1             | 0           | 2.908252                | 4.280064  | 0.768229  |
| 18            | 1             | 0           | 4.280064                | 2.908252  | -0.768229 |
| 19            | 6             | 0           | 3.324798                | -2.527417 | -0.424550 |
| 20            | 6             | 0           | 2.527417                | -3.324798 | 0.424550  |
| 21            | 6             | 0           | 1.247866                | -2.923454 | 0.735116  |
| 22            | 15            | 0           | 0.000000                | -3.935747 | 1.595181  |
| 23            | 6             | 0           | -1.247866               | -2.923454 | 0.735116  |
| 24            | 6             | 0           | -2.527417               | -3.324798 | 0.424550  |
| 25            | 6             | 0           | -3.324798               | -2.527417 | -0.424550 |
| 26            | 6             | 0           | -2.923454               | -1.247866 | -0.735116 |
| 27            | 15            | 0           | -3.935747               | 0.000000  | -1.595181 |
| 28            | 6             | 0           | -2.923454               | 1.247866  | -0.735116 |
| 29            | 6             | 0           | -3.324798               | 2.527417  | -0.424550 |
| 30            | 6             | 0           | -2.527417               | 3.324798  | 0.424550  |
| 31            | 1             | 0           | -4.280064               | 2.908252  | -0.768229 |
| 32            | 1             | 0           | -2.908252               | 4.280064  | 0.768229  |
| 33            | 1             | 0           | -4.280064               | -2.908252 | -0.768229 |
| 34            | 1             | 0           | -2.908252               | -4.280064 | 0.768229  |
| 35            | 1             | 0           | 2.908252                | -4.280064 | 0.768229  |
| 36            | 1             | 0           | 4.280064                | -2.908252 | -0.768229 |
| 37            | 1             | 0           | 0.000000                | 5.067131  | 0.736553  |
| 38            | 1             | 0           | 0.000000                | -5.067131 | 0.736553  |
| 39            | 1             | 0           | -5.067131               | 0.000000  | -0.736553 |
| 40            | 1             | 0           | 5.067131                | 0.000000  | -0.736553 |

**Table S13.** The optimized Cartesian coordinates of the dianion **6** in the ground singlet state calculated at the B3LYP/6-311++G(d, p) level of theory

| Center Number | Atomic Number | Atomic Type | Coordinates (Angstroms) |           |           |
|---------------|---------------|-------------|-------------------------|-----------|-----------|
|               |               |             | X                       | Y         | Z         |
| 1             | 6             | 0           | -1.272652               | 2.983540  | 0.622733  |
| 2             | 15            | 0           | 0.000000                | 4.019569  | 1.415692  |
| 3             | 6             | 0           | -0.721937               | 1.703843  | 0.226437  |
| 4             | 6             | 0           | 0.721937                | 1.703843  | 0.226437  |
| 5             | 6             | 0           | 1.272652                | 2.983540  | 0.622733  |
| 6             | 6             | 0           | -1.703843               | 0.721937  | -0.226437 |
| 7             | 6             | 0           | -1.703843               | -0.721937 | -0.226437 |
| 8             | 6             | 0           | -0.721937               | -1.703843 | 0.226437  |
| 9             | 6             | 0           | 0.721937                | -1.703843 | 0.226437  |
| 10            | 6             | 0           | 1.703843                | -0.721937 | -0.226437 |
| 11            | 6             | 0           | 1.703843                | 0.721937  | -0.226437 |
| 12            | 6             | 0           | 2.983540                | 1.272652  | -0.622733 |
| 13            | 6             | 0           | 2.983540                | -1.272652 | -0.622733 |
| 14            | 15            | 0           | 4.019569                | 0.000000  | -1.415692 |
| 15            | 6             | 0           | 3.408512                | 2.553718  | -0.369754 |
| 16            | 6             | 0           | 2.553718                | 3.408512  | 0.369754  |
| 17            | 1             | 0           | 2.884963                | 4.397486  | 0.676515  |
| 18            | 1             | 0           | 4.397486                | 2.884963  | -0.676515 |
| 19            | 6             | 0           | 3.408512                | -2.553718 | -0.369754 |
| 20            | 6             | 0           | 2.553718                | -3.408512 | 0.369754  |
| 21            | 6             | 0           | 1.272652                | -2.983540 | 0.622733  |
| 22            | 15            | 0           | 0.000000                | -4.019569 | 1.415692  |
| 23            | 6             | 0           | -1.272652               | -2.983540 | 0.622733  |
| 24            | 6             | 0           | -2.553718               | -3.408512 | 0.369754  |
| 25            | 6             | 0           | -3.408512               | -2.553718 | -0.369754 |
| 26            | 6             | 0           | -2.983540               | -1.272652 | -0.622733 |
| 27            | 15            | 0           | -4.019569               | 0.000000  | -1.415692 |
| 28            | 6             | 0           | -2.983540               | 1.272652  | -0.622733 |
| 29            | 6             | 0           | -3.408512               | 2.553718  | -0.369754 |
| 30            | 6             | 0           | -2.553718               | 3.408512  | 0.369754  |
| 31            | 1             | 0           | -4.397486               | 2.884963  | -0.676515 |
| 32            | 1             | 0           | -2.884963               | 4.397486  | 0.676515  |
| 33            | 1             | 0           | -4.397486               | -2.884963 | -0.676515 |
| 34            | 1             | 0           | -2.884963               | -4.397486 | 0.676515  |
| 35            | 1             | 0           | 2.884963                | -4.397486 | 0.676515  |
| 36            | 1             | 0           | 4.397486                | -2.884963 | -0.676515 |
| 37            | 1             | 0           | 0.000000                | 5.124115  | 0.505355  |
| 38            | 1             | 0           | 0.000000                | -5.124115 | 0.505355  |
| 39            | 1             | 0           | -5.124115               | 0.000000  | -0.505355 |
| 40            | 1             | 0           | 5.124115                | 0.000000  | -0.505355 |

**Table S14.** The optimized Cartesian coordinates of the dication **7** in the ground singlet state calculated at the B3LYP/6-311++G(d, p) level of theory

| Center Number | Atomic Number | Atomic Type | Coordinates (Angstroms) |           |           |
|---------------|---------------|-------------|-------------------------|-----------|-----------|
|               |               |             | X                       | Y         | Z         |
| 1             | 6             | 0           | -2.538269               | 3.270408  | 0.483551  |
| 2             | 6             | 0           | -3.270408               | 2.538269  | -0.483551 |
| 3             | 6             | 0           | -2.851217               | 1.281702  | -0.845721 |
| 4             | 6             | 0           | -1.636089               | 0.710526  | -0.331176 |
| 5             | 6             | 0           | -0.710526               | 1.636089  | 0.331176  |
| 6             | 6             | 0           | -1.281702               | 2.851217  | 0.845721  |
| 7             | 33            | 0           | -3.897934               | 0.000000  | -1.894563 |
| 8             | 6             | 0           | -2.851217               | -1.281702 | -0.845721 |
| 9             | 6             | 0           | -1.636089               | -0.710526 | -0.331176 |
| 10            | 6             | 0           | -3.270408               | -2.538269 | -0.483551 |
| 11            | 6             | 0           | -2.538269               | -3.270408 | 0.483551  |
| 12            | 6             | 0           | -1.281702               | -2.851217 | 0.845721  |
| 13            | 6             | 0           | -0.710526               | -1.636089 | 0.331176  |
| 14            | 1             | 0           | -2.952136               | -4.194293 | 0.871907  |
| 15            | 1             | 0           | -4.194293               | -2.952136 | -0.871907 |
| 16            | 1             | 0           | -4.194293               | 2.952136  | -0.871907 |
| 17            | 1             | 0           | -2.952136               | 4.194293  | 0.871907  |
| 18            | 33            | 0           | 0.000000                | 3.897934  | 1.894563  |
| 19            | 6             | 0           | 1.281702                | 2.851217  | 0.845721  |
| 20            | 6             | 0           | 0.710526                | 1.636089  | 0.331176  |
| 21            | 6             | 0           | 1.636089                | 0.710526  | -0.331176 |

|    |    |   |           |           |           |
|----|----|---|-----------|-----------|-----------|
| 22 | 6  | 0 | 2.851217  | 1.281702  | -0.845721 |
| 23 | 6  | 0 | 3.270408  | 2.538269  | -0.483551 |
| 24 | 6  | 0 | 2.538269  | 3.270408  | 0.483551  |
| 25 | 6  | 0 | 1.636089  | -0.710526 | -0.331176 |
| 26 | 6  | 0 | 2.851217  | -1.281702 | -0.845721 |
| 27 | 33 | 0 | 3.897934  | 0.000000  | -1.894563 |
| 28 | 6  | 0 | 0.710526  | -1.636089 | 0.331176  |
| 29 | 6  | 0 | 1.281702  | -2.851217 | 0.845721  |
| 30 | 6  | 0 | 2.538269  | -3.270408 | 0.483551  |
| 31 | 6  | 0 | 3.270408  | -2.538269 | -0.483551 |
| 32 | 1  | 0 | 2.952136  | -4.194293 | 0.871907  |
| 33 | 33 | 0 | 0.000000  | -3.897934 | 1.894563  |
| 34 | 1  | 0 | 4.194293  | -2.952136 | -0.871907 |
| 35 | 1  | 0 | 4.194293  | 2.952136  | -0.871907 |
| 36 | 1  | 0 | 2.952136  | 4.194293  | 0.871907  |
| 37 | 1  | 0 | -5.105192 | 0.000000  | -0.965521 |
| 38 | 1  | 0 | 0.000000  | 5.105192  | 0.965521  |
| 39 | 1  | 0 | 0.000000  | -5.105192 | 0.965521  |
| 40 | 1  | 0 | 5.105192  | 0.000000  | -0.965521 |

**Table S15.** The optimized Cartesian coordinates of the dianion **7** in the ground singlet state calculated at the B3LYP/6-311++G(d, p) level of theory

| Center Number | Atomic Number | Atomic Type | Coordinates (Angstroms) |           |           |
|---------------|---------------|-------------|-------------------------|-----------|-----------|
|               |               |             | X                       | Y         | Z         |
| 1             | 6             | 0           | -2.567474               | 3.365869  | 0.430376  |
| 2             | 6             | 0           | -3.365869               | 2.567474  | -0.430376 |
| 3             | 6             | 0           | -2.923687               | 1.304905  | -0.731290 |
| 4             | 6             | 0           | -1.683565               | 0.721338  | -0.269434 |
| 5             | 6             | 0           | -0.721338               | 1.683565  | 0.269434  |
| 6             | 6             | 0           | -1.304905               | 2.923687  | 0.731290  |
| 7             | 33            | 0           | -3.981842               | 0.000000  | -1.715959 |
| 8             | 6             | 0           | -2.923687               | -1.304905 | -0.731290 |
| 9             | 6             | 0           | -1.683565               | -0.721338 | -0.269434 |
| 10            | 6             | 0           | -3.365869               | -2.567474 | -0.430376 |
| 11            | 6             | 0           | -2.567474               | -3.365869 | 0.430376  |
| 12            | 6             | 0           | -1.304905               | -2.923687 | 0.731290  |
| 13            | 6             | 0           | -0.721338               | -1.683565 | 0.269434  |
| 14            | 1             | 0           | -2.926061               | -4.328477 | 0.785350  |
| 15            | 1             | 0           | -4.328477               | -2.926061 | -0.785350 |
| 16            | 1             | 0           | -4.328477               | 2.926061  | -0.785350 |
| 17            | 1             | 0           | -2.926061               | 4.328477  | 0.785350  |
| 18            | 33            | 0           | 0.000000                | 3.981842  | 1.715959  |
| 19            | 6             | 0           | 1.304905                | 2.923687  | 0.731290  |
| 20            | 6             | 0           | 0.721338                | 1.683565  | 0.269434  |
| 21            | 6             | 0           | 1.683565                | 0.721338  | -0.269434 |
| 22            | 6             | 0           | 2.923687                | 1.304905  | -0.731290 |
| 23            | 6             | 0           | 3.365869                | 2.567474  | -0.430376 |
| 24            | 6             | 0           | 2.567474                | 3.365869  | 0.430376  |
| 25            | 6             | 0           | 1.683565                | -0.721338 | -0.269434 |
| 26            | 6             | 0           | 2.923687                | -1.304905 | -0.731290 |
| 27            | 33            | 0           | 3.981842                | 0.000000  | -1.715959 |
| 28            | 6             | 0           | 0.721338                | -1.683565 | 0.269434  |
| 29            | 6             | 0           | 1.304905                | -2.923687 | 0.731290  |
| 30            | 6             | 0           | 2.567474                | -3.365869 | 0.430376  |
| 31            | 6             | 0           | 3.365869                | -2.567474 | -0.430376 |
| 32            | 1             | 0           | 2.926061                | -4.328477 | 0.785350  |
| 33            | 33            | 0           | 0.000000                | -3.981842 | 1.715959  |
| 34            | 1             | 0           | 4.328477                | -2.926061 | -0.785350 |
| 35            | 1             | 0           | 4.328477                | 2.926061  | -0.785350 |
| 36            | 1             | 0           | 2.926061                | 4.328477  | 0.785350  |
| 37            | 1             | 0           | -5.211679               | 0.000000  | -0.792530 |
| 38            | 1             | 0           | 0.000000                | 5.211679  | 0.792530  |
| 39            | 1             | 0           | 0.000000                | -5.211679 | 0.792530  |
| 40            | 1             | 0           | 5.211679                | 0.000000  | -0.792530 |

**Table S16.** The optimized Cartesian coordinates of the dication **8** in the ground singlet state calculated at the B3LYP/6-311++G(d, p) level of theory

| Center Number | Atomic Number | Atomic Type | Coordinates (Angstroms) |           |           |
|---------------|---------------|-------------|-------------------------|-----------|-----------|
|               |               |             | X                       | Y         | Z         |
| 1             | 6             | 0           | 0.778658                | 3.210971  | -0.004818 |
| 2             | 6             | 0           | -0.459633               | 3.882939  | -0.005489 |
| 3             | 6             | 0           | 0.534447                | 1.776269  | -0.001060 |
| 4             | 6             | 0           | -0.934404               | 1.602365  | -0.009196 |
| 5             | 6             | 0           | -1.506809               | 2.940447  | -0.005438 |
| 6             | 6             | 0           | 1.602380                | 0.934401  | -0.009085 |
| 7             | 6             | 0           | 1.776217                | -0.534428 | -0.000859 |
| 8             | 6             | 0           | 0.934404                | -1.602365 | -0.009196 |
| 9             | 6             | 0           | -0.534447               | -1.776269 | -0.001060 |
| 10            | 6             | 0           | -1.602380               | -0.934401 | -0.009085 |
| 11            | 6             | 0           | -1.776217               | 0.534428  | -0.000859 |
| 12            | 6             | 0           | -3.210982               | 0.778651  | -0.004400 |
| 13            | 6             | 0           | -2.940436               | -1.506808 | -0.005319 |
| 14            | 6             | 0           | -3.882939               | -0.459627 | -0.004702 |
| 15            | 6             | 0           | -3.754763               | 2.078892  | -0.004277 |
| 16            | 6             | 0           | -2.898071               | 3.165646  | -0.005296 |
| 17            | 1             | 0           | -3.286375               | 4.177203  | -0.004977 |
| 18            | 1             | 0           | -4.829026               | 2.220282  | -0.004483 |
| 19            | 6             | 0           | -3.165644               | -2.898079 | -0.005530 |
| 20            | 6             | 0           | -2.078914               | -3.754779 | -0.004653 |
| 21            | 6             | 0           | -0.778658               | -3.210971 | -0.004818 |
| 22            | 6             | 0           | 0.459633                | -3.882939 | -0.005489 |
| 23            | 6             | 0           | 1.506809                | -2.940447 | -0.005438 |
| 24            | 6             | 0           | 2.898071                | -3.165646 | -0.005296 |
| 25            | 6             | 0           | 3.754763                | -2.078892 | -0.004277 |
| 26            | 6             | 0           | 3.210982                | -0.778651 | -0.004400 |
| 27            | 6             | 0           | 3.882939                | 0.459627  | -0.004702 |
| 28            | 6             | 0           | 2.940436                | 1.506808  | -0.005319 |
| 29            | 6             | 0           | 3.165644                | 2.898079  | -0.005530 |
| 30            | 6             | 0           | 2.078914                | 3.754779  | -0.004653 |
| 31            | 1             | 0           | 4.177221                | 3.286338  | -0.005095 |
| 32            | 1             | 0           | 2.220304                | 4.829038  | -0.005161 |
| 33            | 1             | 0           | 4.829026                | -2.220282 | -0.004483 |
| 34            | 1             | 0           | 3.286375                | -4.177203 | -0.004977 |
| 35            | 1             | 0           | -2.220304               | -4.829038 | -0.005161 |
| 36            | 1             | 0           | -4.177221               | -3.286338 | -0.005095 |
| 37            | 1             | 0           | -0.586921               | 4.958335  | -0.005635 |
| 38            | 1             | 0           | 0.586921                | -4.958335 | -0.005635 |
| 39            | 1             | 0           | 4.958333                | 0.586949  | -0.004529 |
| 40            | 1             | 0           | -4.958333               | -0.586949 | -0.004529 |

**Table S17.** The optimized Cartesian coordinates of the dianion **8** in the ground singlet state calculated at the B3LYP/6-311++G(d, p) level of theory

| Center Number | Atomic Number | Atomic Type | Coordinates (Angstroms) |           |           |
|---------------|---------------|-------------|-------------------------|-----------|-----------|
|               |               |             | X                       | Y         | Z         |
| 1             | 6             | 0           | 0.000000                | 1.394788  | 3.024797  |
| 2             | 6             | 0           | 0.000000                | 2.781336  | 2.782479  |
| 3             | 6             | 0           | 0.000000                | 0.693436  | 1.747918  |
| 4             | 6             | 0           | 0.000000                | 1.747592  | 0.694143  |
| 5             | 6             | 0           | 0.000000                | 3.024138  | 1.396265  |
| 6             | 6             | 0           | 0.000000                | -0.694341 | 1.747431  |
| 7             | 6             | 0           | 0.000000                | -1.747669 | 0.693421  |
| 8             | 6             | 0           | 0.000000                | -1.747592 | -0.694143 |
| 9             | 6             | 0           | 0.000000                | -0.693436 | -1.747918 |
| 10            | 6             | 0           | 0.000000                | 0.694341  | -1.747431 |
| 11            | 6             | 0           | 0.000000                | 1.747669  | -0.693421 |
| 12            | 6             | 0           | 0.000000                | 3.024790  | -1.395090 |
| 13            | 6             | 0           | 0.000000                | 1.396190  | -3.024287 |
| 14            | 6             | 0           | 0.000000                | 2.782433  | -2.781329 |
| 15            | 6             | 0           | 0.000000                | 4.253210  | -0.687959 |
| 16            | 6             | 0           | 0.000000                | 4.253019  | 0.689601  |
| 17            | 1             | 0           | 0.000000                | 5.188524  | 1.246389  |

|    |   |   |          |           |           |
|----|---|---|----------|-----------|-----------|
| 18 | 1 | 0 | 0.000000 | 5.189038  | -1.244268 |
| 19 | 6 | 0 | 0.000000 | 0.689661  | -4.253016 |
| 20 | 6 | 0 | 0.000000 | -0.688121 | -4.253263 |
| 21 | 6 | 0 | 0.000000 | -1.394788 | -3.024797 |
| 22 | 6 | 0 | 0.000000 | -2.781336 | -2.782479 |
| 23 | 6 | 0 | 0.000000 | -3.024138 | -1.396265 |
| 24 | 6 | 0 | 0.000000 | -4.253019 | -0.689601 |
| 25 | 6 | 0 | 0.000000 | -4.253210 | 0.687959  |
| 26 | 6 | 0 | 0.000000 | -3.024790 | 1.395090  |
| 27 | 6 | 0 | 0.000000 | -2.782433 | 2.781329  |
| 28 | 6 | 0 | 0.000000 | -1.396190 | 3.024287  |
| 29 | 6 | 0 | 0.000000 | -0.689661 | 4.253016  |
| 30 | 6 | 0 | 0.000000 | 0.688121  | 4.253263  |
| 31 | 1 | 0 | 0.000000 | -1.246397 | 5.188559  |
| 32 | 1 | 0 | 0.000000 | 1.244379  | 5.188970  |
| 33 | 1 | 0 | 0.000000 | -5.189038 | 1.244268  |
| 34 | 1 | 0 | 0.000000 | -5.188524 | -1.246389 |
| 35 | 1 | 0 | 0.000000 | -1.244379 | -5.188970 |
| 36 | 1 | 0 | 0.000000 | 1.246397  | -5.188559 |
| 37 | 1 | 0 | 0.000000 | 3.548909  | 3.550710  |
| 38 | 1 | 0 | 0.000000 | -3.548909 | -3.550710 |
| 39 | 1 | 0 | 0.000000 | -3.550794 | 3.548780  |
| 40 | 1 | 0 | 0.000000 | 3.550794  | -3.548780 |

**Table S18.** The optimized Cartesian coordinates of the dication **9** in the ground singlet state calculated at the B3LYP/6-311++G(d, p) level of theory

| Center Number | Atomic Number | Atomic Type | Coordinates (Angstroms) |           |           |
|---------------|---------------|-------------|-------------------------|-----------|-----------|
|               |               |             | X                       | Y         | Z         |
| 1             | 6             | 0           | 1.382062                | 3.023501  | 0.000015  |
| 2             | 6             | 0           | 2.863940                | 2.863940  | 0.000000  |
| 3             | 6             | 0           | 0.731180                | 1.743976  | 0.000007  |
| 4             | 6             | 0           | 1.743976                | 0.731180  | -0.000007 |
| 5             | 6             | 0           | 3.023501                | 1.382062  | -0.000015 |
| 6             | 6             | 0           | -0.731180               | 1.743976  | 0.000007  |
| 7             | 6             | 0           | -1.743976               | 0.731180  | -0.000007 |
| 8             | 6             | 0           | -1.743976               | -0.731180 | -0.000007 |
| 9             | 6             | 0           | -0.731180               | -1.743976 | 0.000007  |
| 10            | 6             | 0           | 0.731180                | -1.743976 | 0.000007  |
| 11            | 6             | 0           | 1.743976                | -0.731180 | -0.000007 |
| 12            | 6             | 0           | 3.023501                | -1.382062 | -0.000015 |
| 13            | 6             | 0           | 1.382062                | -3.023501 | 0.000015  |
| 14            | 6             | 0           | 2.863940                | -2.863940 | 0.000000  |
| 15            | 6             | 0           | 4.217412                | -0.704538 | -0.000032 |
| 16            | 6             | 0           | 4.217412                | 0.704538  | -0.000032 |
| 17            | 1             | 0           | 5.155448                | 1.248097  | -0.000042 |
| 18            | 1             | 0           | 5.155448                | -1.248097 | -0.000042 |
| 19            | 6             | 0           | 0.704538                | -4.217412 | 0.000032  |
| 20            | 6             | 0           | -0.704538               | -4.217412 | 0.000032  |
| 21            | 6             | 0           | -1.382062               | -3.023501 | 0.000015  |
| 22            | 6             | 0           | -2.863940               | -2.863940 | 0.000000  |
| 23            | 6             | 0           | -3.023501               | -1.382062 | -0.000015 |
| 24            | 6             | 0           | -4.217412               | -0.704538 | -0.000032 |
| 25            | 6             | 0           | -4.217412               | 0.704538  | -0.000032 |
| 26            | 6             | 0           | -3.023501               | 1.382062  | -0.000015 |
| 27            | 6             | 0           | -2.863940               | 2.863940  | 0.000000  |
| 28            | 6             | 0           | -1.382062               | 3.023501  | 0.000015  |
| 29            | 6             | 0           | -0.704538               | 4.217412  | 0.000032  |
| 30            | 6             | 0           | 0.704538                | 4.217412  | 0.000032  |
| 31            | 1             | 0           | -1.248097               | 5.155448  | 0.000042  |
| 32            | 1             | 0           | 1.248097                | 5.155448  | 0.000042  |
| 33            | 1             | 0           | -5.155448               | 1.248097  | -0.000042 |
| 34            | 1             | 0           | -5.155448               | -1.248097 | -0.000042 |
| 35            | 1             | 0           | -1.248097               | -5.155448 | 0.000042  |
| 36            | 1             | 0           | 1.248097                | -5.155448 | 0.000042  |
| 37            | 1             | 0           | 3.326159                | 3.326139  | 0.879745  |
| 38            | 1             | 0           | -3.326159               | -3.326139 | 0.879745  |
| 39            | 1             | 0           | -3.326159               | 3.326139  | 0.879745  |
| 40            | 1             | 0           | 3.326159                | -3.326139 | 0.879745  |
| 41            | 1             | 0           | 3.326139                | 3.326159  | -0.879745 |
| 42            | 1             | 0           | 3.326139                | -3.326159 | -0.879745 |
| 43            | 1             | 0           | -3.326139               | -3.326159 | -0.879745 |
| 44            | 1             | 0           | -3.326139               | 3.326159  | -0.879745 |

**Table S19.** The optimized Cartesian coordinates of the dianion **9** in the ground singlet state calculated at the B3LYP/6–311++G(d, p) level of theory

| Center Number | Atomic Number | Atomic Type | Coordinates (Angstroms) |           |           |
|---------------|---------------|-------------|-------------------------|-----------|-----------|
|               |               |             | X                       | Y         | Z         |
| 1             | 6             | 0           | 0.000000                | 1.394788  | 3.024797  |
| 2             | 6             | 0           | 0.000000                | 2.781336  | 2.782479  |
| 3             | 6             | 0           | 0.000000                | 0.693436  | 1.747918  |
| 4             | 6             | 0           | 0.000000                | 1.747592  | 0.694143  |
| 5             | 6             | 0           | 0.000000                | 3.024138  | 1.396265  |
| 6             | 6             | 0           | 0.000000                | -0.694341 | 1.747431  |
| 7             | 6             | 0           | 0.000000                | -1.747669 | 0.693421  |
| 8             | 6             | 0           | 0.000000                | -1.747592 | -0.694143 |
| 9             | 6             | 0           | 0.000000                | -0.693436 | -1.747918 |
| 10            | 6             | 0           | 0.000000                | 0.694341  | -1.747431 |
| 11            | 6             | 0           | 0.000000                | 1.747669  | -0.693421 |
| 12            | 6             | 0           | 0.000000                | 3.024790  | -1.395090 |
| 13            | 6             | 0           | 0.000000                | 1.396190  | -3.024287 |
| 14            | 6             | 0           | 0.000000                | 2.782433  | -2.781329 |
| 15            | 6             | 0           | 0.000000                | 4.253210  | -0.687959 |
| 16            | 6             | 0           | 0.000000                | 4.253019  | 0.689601  |
| 17            | 1             | 0           | 0.000000                | 5.188524  | 1.246389  |
| 18            | 1             | 0           | 0.000000                | 5.189038  | -1.244268 |
| 19            | 6             | 0           | 0.000000                | 0.689661  | -4.253016 |
| 20            | 6             | 0           | 0.000000                | -0.688121 | -4.253263 |
| 21            | 6             | 0           | 0.000000                | -1.394788 | -3.024797 |
| 22            | 6             | 0           | 0.000000                | -2.781336 | -2.782479 |
| 23            | 6             | 0           | 0.000000                | -3.024138 | -1.396265 |
| 24            | 6             | 0           | 0.000000                | -4.253019 | -0.689601 |
| 25            | 6             | 0           | 0.000000                | -4.253210 | 0.687959  |
| 26            | 6             | 0           | 0.000000                | -3.024790 | 1.395090  |
| 27            | 6             | 0           | 0.000000                | -2.782433 | 2.781329  |
| 28            | 6             | 0           | 0.000000                | -1.396190 | 3.024287  |
| 29            | 6             | 0           | 0.000000                | -0.689661 | 4.253016  |
| 30            | 6             | 0           | 0.000000                | 0.688121  | 4.253263  |
| 31            | 1             | 0           | 0.000000                | -1.246397 | 5.188559  |
| 32            | 1             | 0           | 0.000000                | 1.244379  | 5.188970  |
| 33            | 1             | 0           | 0.000000                | -5.189038 | 1.244268  |
| 34            | 1             | 0           | 0.000000                | -5.188524 | -1.246389 |
| 35            | 1             | 0           | 0.000000                | -1.244379 | -5.188970 |
| 36            | 1             | 0           | 0.000000                | 1.246397  | -5.188559 |
| 37            | 1             | 0           | 0.000000                | 3.548909  | 3.550710  |
| 38            | 1             | 0           | 0.000000                | -3.548909 | -3.550710 |
| 39            | 1             | 0           | 0.000000                | -3.550794 | 3.548780  |
| 40            | 1             | 0           | 0.000000                | 3.550794  | -3.548780 |

**Table S20.** The optimized Cartesian coordinates of the dication **10** in the ground singlet state calculated at the B3LYP/6–311++G(d, p) level of theory

| Center Number | Atomic Number | Atomic Type | Coordinates (Angstroms) |           |           |
|---------------|---------------|-------------|-------------------------|-----------|-----------|
|               |               |             | X                       | Y         | Z         |
| 1             | 6             | 0           | -1.060777               | 2.984088  | 0.810040  |
| 2             | 6             | 0           | -0.683455               | 1.666604  | 0.323957  |
| 3             | 6             | 0           | 0.683455                | 1.666604  | -0.323957 |
| 4             | 6             | 0           | 1.666604                | 0.683455  | -0.323957 |
| 5             | 6             | 0           | 2.984088                | 1.060777  | -0.810040 |
| 6             | 6             | 0           | -1.666604               | 0.683455  | 0.323957  |
| 7             | 6             | 0           | -1.666604               | -0.683455 | -0.323957 |
| 8             | 6             | 0           | -0.683455               | -1.666604 | -0.323957 |
| 9             | 6             | 0           | 0.683455                | -1.666604 | 0.323957  |
| 10            | 6             | 0           | 1.666604                | -0.683455 | 0.323957  |
| 11            | 6             | 0           | 2.984088                | -1.060777 | 0.810040  |
| 12            | 14            | 0           | 4.178236                | 0.000000  | 0.000000  |
| 13            | 6             | 0           | 3.230987                | -2.255444 | 1.498299  |
| 14            | 6             | 0           | 2.255444                | -3.230987 | 1.498299  |
| 15            | 6             | 0           | 1.060777                | -2.984088 | 0.810040  |
| 16            | 14            | 0           | 0.000000                | -4.178236 | 0.000000  |
| 17            | 6             | 0           | -1.060777               | -2.984088 | -0.810040 |
| 18            | 6             | 0           | -2.984088               | -1.060777 | -0.810040 |
| 19            | 6             | 0           | -3.230987               | -2.255444 | -1.498299 |

|    |    |   |           |           |           |
|----|----|---|-----------|-----------|-----------|
| 20 | 6  | 0 | -2.255444 | -3.230987 | -1.498299 |
| 21 | 1  | 0 | -2.454532 | -4.206649 | -1.926331 |
| 22 | 1  | 0 | -4.206649 | -2.454532 | -1.926331 |
| 23 | 1  | 0 | 0.000000  | -5.646629 | 0.000000  |
| 24 | 1  | 0 | 2.454532  | -4.206649 | 1.926331  |
| 25 | 1  | 0 | 4.206649  | -2.454532 | 1.926331  |
| 26 | 1  | 0 | 5.646629  | 0.000000  | 0.000000  |
| 27 | 6  | 0 | 3.230987  | 2.255444  | -1.498299 |
| 28 | 6  | 0 | 2.255444  | 3.230987  | -1.498299 |
| 29 | 6  | 0 | 1.060777  | 2.984088  | -0.810040 |
| 30 | 14 | 0 | 0.000000  | 4.178236  | 0.000000  |
| 31 | 6  | 0 | -2.255444 | 3.230987  | 1.498299  |
| 32 | 6  | 0 | -3.230987 | 2.255444  | 1.498299  |
| 33 | 6  | 0 | -2.984088 | 1.060777  | 0.810040  |
| 34 | 14 | 0 | -4.178236 | 0.000000  | 0.000000  |
| 35 | 1  | 0 | -5.646629 | 0.000000  | 0.000000  |
| 36 | 1  | 0 | -4.206649 | 2.454532  | 1.926331  |
| 37 | 1  | 0 | -2.454532 | 4.206649  | 1.926331  |
| 38 | 1  | 0 | 0.000000  | 5.646629  | 0.000000  |
| 39 | 1  | 0 | 2.454532  | 4.206649  | -1.926331 |
| 40 | 1  | 0 | 4.206649  | 2.454532  | -1.926331 |

**Table S21.** The optimized Cartesian coordinates of the dianion **10** in the ground singlet state calculated at the B3LYP/6–311++G(d, p) level of theory

| Center Number | Atomic Number | Atomic Type | Coordinates (Angstroms) |           |           |
|---------------|---------------|-------------|-------------------------|-----------|-----------|
|               |               |             | X                       | Y         | Z         |
| 1             | 6             | 0           | 1.096381                | -2.953617 | -0.789400 |
| 2             | 6             | 0           | 0.533297                | -1.730014 | -0.269824 |
| 3             | 6             | 0           | 1.588860                | -0.868752 | 0.395744  |
| 4             | 6             | 0           | 1.730472                | 0.532292  | 0.397191  |
| 5             | 6             | 0           | 2.987290                | 1.079781  | 0.840371  |
| 6             | 6             | 0           | -0.869626               | -1.588216 | -0.268325 |
| 7             | 6             | 0           | -1.730472               | -0.532292 | 0.397191  |
| 8             | 6             | 0           | -1.588860               | 0.868752  | 0.395744  |
| 9             | 6             | 0           | -0.533297               | 1.730014  | -0.269824 |
| 10            | 6             | 0           | 0.869626                | 1.588216  | -0.268325 |
| 11            | 6             | 0           | 1.667212                | 2.674832  | -0.785552 |
| 12            | 14            | 0           | 3.255672                | 2.789463  | 0.173679  |
| 13            | 6             | 0           | 1.070652                | 3.712516  | -1.513057 |
| 14            | 6             | 0           | -0.302592               | 3.850883  | -1.515203 |
| 15            | 6             | 0           | -1.096381               | 2.953617  | -0.789400 |
| 16            | 14            | 0           | -2.631909               | 3.384847  | 0.166031  |
| 17            | 6             | 0           | -2.710976               | 1.657524  | 0.836690  |
| 18            | 6             | 0           | -2.987290               | -1.079781 | 0.840371  |
| 19            | 6             | 0           | -3.946558               | -0.294438 | 1.481973  |
| 20            | 6             | 0           | -3.807813               | 1.081412  | 1.479858  |
| 21            | 1             | 0           | -4.604840               | 1.717307  | 1.860575  |
| 22            | 1             | 0           | -4.854351               | -0.757226 | 1.864464  |
| 23            | 1             | 0           | -3.865034               | 3.613300  | -0.682628 |
| 24            | 1             | 0           | -0.759290               | 4.734948  | -1.956594 |
| 25            | 1             | 0           | 1.695922                | 4.487585  | -1.952685 |
| 26            | 1             | 0           | 4.511615                | 2.769619  | -0.672045 |
| 27            | 6             | 0           | 3.946558                | 0.294438  | 1.481973  |
| 28            | 6             | 0           | 3.807813                | -1.081412 | 1.479858  |
| 29            | 6             | 0           | 2.710976                | -1.657524 | 0.836690  |
| 30            | 14            | 0           | 2.631909                | -3.384847 | 0.166031  |
| 31            | 6             | 0           | 0.302592                | -3.850883 | -1.515203 |
| 32            | 6             | 0           | -1.070652               | -3.712516 | -1.513057 |
| 33            | 6             | 0           | -1.667212               | -2.674832 | -0.785552 |
| 34            | 14            | 0           | -3.255672               | -2.789463 | 0.173679  |
| 35            | 1             | 0           | -4.511615               | -2.769619 | -0.672045 |
| 36            | 1             | 0           | -1.695922               | -4.487585 | -1.952685 |
| 37            | 1             | 0           | 0.759290                | -4.734948 | -1.956594 |
| 38            | 1             | 0           | 3.865034                | -3.613300 | -0.682628 |
| 39            | 1             | 0           | 4.604840                | -1.717307 | 1.860575  |
| 40            | 1             | 0           | 4.854351                | 0.757226  | 1.864464  |

**Table S22.** The optimized Cartesian coordinates of the compound **10** in the ground singlet state calculated at the B3LYP/6-311++G(d, p) level of theory

| Center Number | Atomic Number | Atomic Type | Coordinates (Angstroms) |           |           |
|---------------|---------------|-------------|-------------------------|-----------|-----------|
|               |               |             | X                       | Y         | Z         |
| 1             | 6             | 0           | -3.225573               | 0.158726  | 0.695838  |
| 2             | 6             | 0           | -1.819452               | 0.001232  | 0.312157  |
| 3             | 6             | 0           | -1.286458               | 1.244650  | -0.333493 |
| 4             | 6             | 0           | 0.000810                | 1.795665  | -0.251150 |
| 5             | 6             | 0           | 0.160060                | 3.164887  | -0.674767 |
| 6             | 6             | 0           | -1.247505               | -1.260989 | 0.427462  |
| 7             | 6             | 0           | -0.000810               | -1.795665 | -0.251150 |
| 8             | 6             | 0           | 1.286458                | -1.244650 | -0.333493 |
| 9             | 6             | 0           | 1.819452                | -0.001232 | 0.312157  |
| 10            | 6             | 0           | 1.247505                | 1.260989  | 0.427462  |
| 11            | 6             | 0           | 2.061113                | 2.309749  | 1.032217  |
| 12            | 14            | 0           | 1.562751                | 3.807813  | 0.253271  |
| 13            | 6             | 0           | 3.272478                | 2.019027  | 1.712075  |
| 14            | 6             | 0           | 3.852565                | 0.796624  | 1.532824  |
| 15            | 6             | 0           | 3.225573                | -0.158726 | 0.695838  |
| 16            | 14            | 0           | 3.998612                | -1.355438 | -0.423758 |
| 17            | 6             | 0           | 2.344467                | -2.068121 | -0.861575 |
| 18            | 6             | 0           | -0.160060               | -3.164887 | -0.674767 |
| 19            | 6             | 0           | 0.844413                | -3.874287 | -1.335749 |
| 20            | 6             | 0           | 2.098849                | -3.302844 | -1.459605 |
| 21            | 1             | 0           | 2.910708                | -3.862864 | -1.911703 |
| 22            | 1             | 0           | 0.665174                | -4.889272 | -1.675623 |
| 23            | 1             | 0           | 4.987401                | -2.338752 | 0.103605  |
| 24            | 1             | 0           | 4.840104                | 0.592428  | 1.933392  |
| 25            | 1             | 0           | 3.775422                | 2.797626  | 2.276265  |
| 26            | 1             | 0           | 2.086234                | 5.182971  | 0.343236  |
| 27            | 6             | 0           | -0.844413               | 3.874287  | -1.335749 |
| 28            | 6             | 0           | -2.098849               | 3.302844  | -1.459605 |
| 29            | 6             | 0           | -2.344467               | 2.068121  | -0.861575 |
| 30            | 14            | 0           | -3.998612               | 1.355438  | -0.423758 |
| 31            | 6             | 0           | -3.852565               | -0.796624 | 1.532824  |
| 32            | 6             | 0           | -3.272478               | -2.019027 | 1.712075  |
| 33            | 6             | 0           | -2.061113               | -2.309749 | 1.032217  |
| 34            | 14            | 0           | -1.562751               | -3.807813 | 0.253271  |
| 35            | 1             | 0           | -2.086234               | -5.182971 | 0.343236  |
| 36            | 1             | 0           | -3.775422               | -2.797626 | 2.276265  |
| 37            | 1             | 0           | -4.840104               | -0.592428 | 1.933392  |
| 38            | 1             | 0           | -4.987401               | 2.338752  | 0.103605  |
| 39            | 1             | 0           | -2.910708               | 3.862864  | -1.911703 |
| 40            | 1             | 0           | -0.665174               | 4.889272  | -1.675623 |

**Table S23.** The optimized Cartesian coordinates of the dication **11** in the ground singlet state calculated at the B3LYP/6-311++G(d, p) level of theory

| Center Number | Atomic Number | Atomic Type | Coordinates (Angstroms) |           |           |
|---------------|---------------|-------------|-------------------------|-----------|-----------|
|               |               |             | X                       | Y         | Z         |
| 1             | 6             | 0           | -1.037186               | 2.953551  | 0.877517  |
| 2             | 6             | 0           | -0.671658               | 1.657065  | 0.348391  |
| 3             | 6             | 0           | 0.671658                | 1.657065  | -0.348391 |
| 4             | 6             | 0           | 1.657065                | 0.671658  | -0.348391 |
| 5             | 6             | 0           | 2.953551                | 1.037186  | -0.877517 |
| 6             | 6             | 0           | -1.657065               | 0.671658  | 0.348391  |
| 7             | 6             | 0           | -1.657065               | -0.671658 | -0.348391 |
| 8             | 6             | 0           | -0.671658               | -1.657065 | -0.348391 |
| 9             | 6             | 0           | 0.671658                | -1.657065 | 0.348391  |
| 10            | 6             | 0           | 1.657065                | -0.671658 | 0.348391  |
| 11            | 6             | 0           | 2.953551                | -1.037186 | 0.877517  |
| 12            | 32            | 0           | 4.242734                | 0.000000  | 0.000000  |
| 13            | 6             | 0           | 3.182525                | -2.205628 | 1.609886  |
| 14            | 6             | 0           | 2.205628                | -3.182525 | 1.609886  |
| 15            | 6             | 0           | 1.037186                | -2.953551 | 0.877517  |
| 16            | 32            | 0           | 0.000000                | -4.242734 | 0.000000  |
| 17            | 6             | 0           | -1.037186               | -2.953551 | -0.877517 |



|    |    |   |           |           |           |
|----|----|---|-----------|-----------|-----------|
| 18 | 6  | 0 | -2.953551 | -1.037186 | -0.877517 |
| 19 | 6  | 0 | -3.182525 | -2.205628 | -1.609886 |
| 20 | 6  | 0 | -2.205628 | -3.182525 | -1.609886 |
| 21 | 1  | 0 | -2.392967 | -4.146259 | -2.068670 |
| 22 | 1  | 0 | -4.146259 | -2.392967 | -2.068670 |
| 23 | 1  | 0 | 0.000000  | -5.755927 | 0.000000  |
| 24 | 1  | 0 | 2.392967  | -4.146259 | 2.068670  |
| 25 | 1  | 0 | 4.146259  | -2.392967 | 2.068670  |
| 26 | 1  | 0 | 5.755927  | 0.000000  | 0.000000  |
| 27 | 6  | 0 | 3.182525  | 2.205628  | -1.609886 |
| 28 | 6  | 0 | 2.205628  | 3.182525  | -1.609886 |
| 29 | 6  | 0 | 1.037186  | 2.953551  | -0.877517 |
| 30 | 32 | 0 | 0.000000  | 4.242734  | 0.000000  |
| 31 | 6  | 0 | -2.205628 | 3.182525  | 1.609886  |
| 32 | 6  | 0 | -3.182525 | 2.205628  | 1.609886  |
| 33 | 6  | 0 | -2.953551 | 1.037186  | 0.877517  |
| 34 | 32 | 0 | -4.242734 | 0.000000  | 0.000000  |
| 35 | 1  | 0 | -5.755927 | 0.000000  | 0.000000  |
| 36 | 1  | 0 | -4.146259 | 2.392967  | 2.068670  |
| 37 | 1  | 0 | -2.392967 | 4.146259  | 2.068670  |
| 38 | 1  | 0 | 0.000000  | 5.755927  | 0.000000  |
| 39 | 1  | 0 | 2.392967  | 4.146259  | -2.068670 |
| 40 | 1  | 0 | 4.146259  | 2.392967  | -2.068670 |

**Table S24.** The optimized Cartesian coordinates of the dianion **11** in the ground singlet state calculated at the B3LYP/6-311++G(d, p) level of theory

| Center Number | Atomic Number | Atomic Type | Coordinates (Angstroms) |           |           |
|---------------|---------------|-------------|-------------------------|-----------|-----------|
|               |               |             | X                       | Y         | Z         |
| 1             | 6             | 0           | -2.630107               | 1.652810  | 0.903813  |
| 2             | 6             | 0           | -1.572091               | 0.863057  | 0.338762  |
| 3             | 6             | 0           | -0.540412               | 1.708436  | -0.380546 |
| 4             | 6             | 0           | 0.861587                | 1.571007  | -0.381113 |
| 5             | 6             | 0           | 1.639721                | 2.668132  | -0.881567 |
| 6             | 6             | 0           | -1.709819               | -0.541589 | 0.338201  |
| 7             | 6             | 0           | -0.861587               | -1.571007 | -0.381113 |
| 8             | 6             | 0           | 0.540412                | -1.708436 | -0.380546 |
| 9             | 6             | 0           | 1.572091                | -0.863057 | 0.338762  |
| 10            | 6             | 0           | 1.709819                | 0.541589  | 0.338201  |
| 11            | 6             | 0           | 2.901354                | 1.111124  | 0.902374  |
| 12            | 32            | 0           | 3.439408                | 2.703268  | -0.112857 |
| 13            | 6             | 0           | 3.785390                | 0.325585  | 1.643390  |
| 14            | 6             | 0           | 3.649981                | -1.053308 | 1.644193  |
| 15            | 6             | 0           | 2.630107                | -1.652810 | 0.903813  |
| 16            | 32            | 0           | 2.849040                | -3.320317 | -0.109759 |
| 17            | 6             | 0           | 1.090954                | -2.936105 | -0.880010 |
| 18            | 6             | 0           | -1.639721               | -2.668132 | -0.881567 |
| 19            | 6             | 0           | -1.060993               | -3.720202 | -1.585423 |
| 20            | 6             | 0           | 0.319507                | -3.855705 | -1.584533 |
| 21            | 1             | 0           | 0.786697                | -4.742936 | -2.007671 |
| 22            | 1             | 0           | -1.691255               | -4.499651 | -2.009327 |
| 23            | 1             | 0           | 2.591367                | -4.598223 | 0.786454  |
| 24            | 1             | 0           | 4.418472                | -1.673226 | 2.102401  |
| 25            | 1             | 0           | 4.659863                | 0.784719  | 2.100898  |
| 26            | 1             | 0           | 3.437795                | 4.007961  | 0.781670  |
| 27            | 6             | 0           | 1.060993                | 3.720202  | -1.585423 |
| 28            | 6             | 0           | -0.319507               | 3.855705  | -1.584533 |
| 29            | 6             | 0           | -1.090954               | 2.936105  | -0.880010 |
| 30            | 32            | 0           | -2.849040               | 3.320317  | -0.109759 |
| 31            | 6             | 0           | -3.649981               | 1.053308  | 1.644193  |
| 32            | 6             | 0           | -3.785390               | -0.325585 | 1.643390  |
| 33            | 6             | 0           | -2.901354               | -1.111124 | 0.902374  |
| 34            | 32            | 0           | -3.439408               | -2.703268 | -0.112857 |
| 35            | 1             | 0           | -3.437795               | -4.007961 | 0.781670  |
| 36            | 1             | 0           | -4.659863               | -0.784719 | 2.100898  |
| 37            | 1             | 0           | -4.418472               | 1.673226  | 2.102401  |
| 38            | 1             | 0           | -2.591367               | 4.598223  | 0.786454  |
| 39            | 1             | 0           | -0.786697               | 4.742936  | -2.007671 |
| 40            | 1             | 0           | 1.691255                | 4.499651  | -2.009327 |

**Table S25.** The optimized Cartesian coordinates of the compound **11** in the ground singlet state calculated at the B3LYP/6–311++G(d, p) level of theory

| Center Number | Atomic Number | Atomic Type | Coordinates (Angstroms) |           |           |
|---------------|---------------|-------------|-------------------------|-----------|-----------|
|               |               |             | X                       | Y         | Z         |
| 1             | 6             | 0           | -2.740845               | 1.640294  | 0.722089  |
| 2             | 6             | 0           | -1.597212               | 0.854279  | 0.309401  |
| 3             | 6             | 0           | -0.564249               | 1.693834  | -0.379970 |
| 4             | 6             | 0           | 0.828466                | 1.581449  | -0.278978 |
| 5             | 6             | 0           | 1.607367                | 2.706250  | -0.728816 |
| 6             | 6             | 0           | -1.657535               | -0.536857 | 0.450511  |
| 7             | 6             | 0           | -0.828466               | -1.581449 | -0.278978 |
| 8             | 6             | 0           | 0.564249                | -1.693834 | -0.379970 |
| 9             | 6             | 0           | 1.597212                | -0.854279 | 0.309401  |
| 10            | 6             | 0           | 1.657535                | 0.536857  | 0.450511  |
| 11            | 6             | 0           | 2.808668                | 1.075623  | 1.126020  |
| 12            | 32            | 0           | 3.141141                | 2.725038  | 0.335326  |
| 13            | 6             | 0           | 3.752308                | 0.267379  | 1.783012  |
| 14            | 6             | 0           | 3.718104                | -1.092470 | 1.565408  |
| 15            | 6             | 0           | 2.740845                | -1.640294 | 0.722089  |
| 16            | 32            | 0           | 3.014364                | -3.144099 | -0.503332 |
| 17            | 6             | 0           | 1.115283                | -2.897234 | -0.940910 |
| 18            | 6             | 0           | -1.607367               | -2.706250 | -0.728816 |
| 19            | 6             | 0           | -1.057201               | -3.777215 | -1.442309 |
| 20            | 6             | 0           | 0.315169                | -3.841114 | -1.587202 |
| 21            | 1             | 0           | 0.770359                | -4.692941 | -2.081665 |
| 22            | 1             | 0           | -1.692262               | -4.580968 | -1.800430 |
| 23            | 1             | 0           | 3.028174                | -4.493135 | 0.290701  |
| 24            | 1             | 0           | 4.516785                | -1.722030 | 1.944371  |
| 25            | 1             | 0           | 4.554038                | 0.719467  | 2.358028  |
| 26            | 1             | 0           | 4.285638                | 3.718582  | 0.468095  |
| 27            | 6             | 0           | 1.057201                | 3.777215  | -1.442309 |
| 28            | 6             | 0           | -0.315169               | 3.841114  | -1.587202 |
| 29            | 6             | 0           | -1.115283               | 2.897234  | -0.940910 |
| 30            | 32            | 0           | -3.014364               | 3.144099  | -0.503332 |
| 31            | 6             | 0           | -3.718104               | 1.092470  | 1.565408  |
| 32            | 6             | 0           | -3.752308               | -0.267379 | 1.783012  |
| 33            | 6             | 0           | -2.808668               | -1.075623 | 1.126020  |
| 34            | 32            | 0           | -3.141141               | -2.725038 | 0.335326  |
| 35            | 1             | 0           | -4.285638               | -3.718582 | 0.468095  |
| 36            | 1             | 0           | -4.554038               | -0.719467 | 2.358028  |
| 37            | 1             | 0           | -4.516785               | 1.722030  | 1.944371  |
| 38            | 1             | 0           | -3.028174               | 4.493135  | 0.290701  |
| 39            | 1             | 0           | -0.770359               | 4.692941  | -2.081665 |
| 40            | 1             | 0           | 1.692262                | 4.580968  | -1.800430 |

**Table S26.** The optimized Cartesian coordinates of the dication **12** in the ground singlet state calculated at the B3LYP/6–311++G(d, p) level of theory

| Center Number | Atomic Number | Atomic Type | Coordinates (Angstroms) |           |           |
|---------------|---------------|-------------|-------------------------|-----------|-----------|
|               |               |             | X                       | Y         | Z         |
| 1             | 6             | 0           | 4.039540                | 0.807517  | -0.508021 |
| 2             | 6             | 0           | 4.115383                | -0.184868 | 0.507810  |
| 3             | 6             | 0           | 2.982685                | -0.849099 | 0.908843  |
| 4             | 6             | 0           | 1.693489                | -0.508059 | 0.356189  |
| 5             | 6             | 0           | 1.596591                | 0.759282  | -0.356275 |
| 6             | 6             | 0           | 2.819114                | 1.292035  | -0.908969 |
| 7             | 14            | 0           | 2.457937                | 2.864365  | -1.888185 |
| 8             | 6             | 0           | 0.849102                | 2.982685  | -0.908822 |
| 9             | 6             | 0           | 0.508062                | 1.693490  | -0.356167 |
| 10            | 6             | 0           | -0.759280               | 1.596593  | 0.356296  |
| 11            | 6             | 0           | -1.292034               | 2.819117  | 0.908987  |
| 12            | 6             | 0           | -0.807515               | 4.039542  | 0.508039  |
| 13            | 6             | 0           | 0.184871                | 4.115384  | -0.507792 |
| 14            | 6             | 0           | -1.693489               | 0.508064  | 0.356188  |
| 15            | 6             | 0           | -2.982684               | 0.849105  | 0.908841  |
| 16            | 14            | 0           | -2.864365               | 2.457941  | 1.888202  |
| 17            | 6             | 0           | -1.596591               | -0.759279 | -0.356273 |

|    |    |   |           |           |           |
|----|----|---|-----------|-----------|-----------|
| 18 | 6  | 0 | -2.819113 | -1.292034 | -0.908964 |
| 19 | 6  | 0 | -4.039539 | -0.807515 | -0.508018 |
| 20 | 6  | 0 | -4.115382 | 0.184873  | 0.507811  |
| 21 | 6  | 0 | -0.508061 | -1.693487 | -0.356162 |
| 22 | 6  | 0 | -0.849101 | -2.982684 | -0.908814 |
| 23 | 14 | 0 | -2.457937 | -2.864366 | -1.888177 |
| 24 | 6  | 0 | -0.184870 | -4.115381 | -0.507782 |
| 25 | 6  | 0 | 0.807517  | -4.039537 | 0.508048  |
| 26 | 6  | 0 | 1.292035  | -2.819110 | 0.908994  |
| 27 | 6  | 0 | 0.759281  | -1.596589 | 0.356300  |
| 28 | 14 | 0 | 2.864366  | -2.457932 | 1.888208  |
| 29 | 1  | 0 | -0.453138 | -5.086553 | -0.909358 |
| 30 | 1  | 0 | 1.220157  | -4.958651 | 0.909738  |
| 31 | 1  | 0 | 3.967635  | -3.404792 | 1.640971  |
| 32 | 1  | 0 | 5.086554  | -0.453135 | 0.909388  |
| 33 | 1  | 0 | 4.958654  | 1.220157  | -0.909711 |
| 34 | 1  | 0 | 3.404796  | 3.967634  | -1.640948 |
| 35 | 1  | 0 | 0.453139  | 5.086554  | -0.909370 |
| 36 | 1  | 0 | -1.220156 | 4.958657  | 0.909727  |
| 37 | 1  | 0 | -5.086553 | 0.453142  | 0.909388  |
| 38 | 1  | 0 | -4.958654 | -1.220156 | -0.909706 |
| 39 | 1  | 0 | -3.404796 | -3.967635 | -1.640937 |
| 40 | 1  | 0 | 2.227650  | 2.596013  | -3.323252 |
| 41 | 1  | 0 | -2.596015 | 2.227656  | 3.323270  |
| 42 | 1  | 0 | -2.227651 | -2.596018 | -3.323245 |
| 43 | 1  | 0 | 2.596015  | -2.227643 | 3.323275  |
| 44 | 1  | 0 | -3.967634 | 3.404800  | 1.640962  |

**Table S27.** The optimized Cartesian coordinates of the dianion **12** in the ground singlet state calculated at the B3LYP/6-311++G(d, p) level of theory

| Center Number | Atomic Number | Atomic Type | Coordinates (Angstroms) |           |           |
|---------------|---------------|-------------|-------------------------|-----------|-----------|
|               |               |             | X                       | Y         | Z         |
| 1             | 6             | 0           | 0.690264                | 3.849159  | 1.508911  |
| 2             | 6             | 0           | -0.690172               | 3.848385  | 1.511274  |
| 3             | 6             | 0           | -1.381989               | 2.841078  | 0.816933  |
| 4             | 6             | 0           | -0.704370               | 1.659959  | 0.330476  |
| 5             | 6             | 0           | 0.702787                | 1.660557  | 0.328439  |
| 6             | 6             | 0           | 1.380883                | 2.842338  | 0.812662  |
| 7             | 14            | 0           | 3.018025                | 3.018821  | -0.002350 |
| 8             | 6             | 0           | 2.842048                | 1.381083  | -0.816207 |
| 9             | 6             | 0           | 1.660976                | 0.702609  | -0.330962 |
| 10            | 6             | 0           | 1.661476                | -0.704557 | -0.331493 |
| 11            | 6             | 0           | 2.843338                | -1.381800 | -0.816852 |
| 12            | 6             | 0           | 3.850200                | -0.689913 | -1.511755 |
| 13            | 6             | 0           | 3.849415                | 0.690518  | -1.511735 |
| 14            | 6             | 0           | 0.703511                | -1.663913 | 0.326079  |
| 15            | 6             | 0           | 1.381936                | -2.845945 | 0.809161  |
| 16            | 14            | 0           | 3.019750                | -3.020452 | -0.004874 |
| 17            | 6             | 0           | -0.703651               | -1.664504 | 0.326452  |
| 18            | 6             | 0           | -1.380920               | -2.847225 | 0.809539  |
| 19            | 6             | 0           | -0.689115               | -3.855369 | 1.502712  |
| 20            | 6             | 0           | 0.691312                | -3.854573 | 1.502765  |
| 21            | 6             | 0           | -1.662968               | -0.705301 | -0.329462 |
| 22            | 6             | 0           | -2.844835               | -1.382849 | -0.814030 |
| 23            | 14            | 0           | -3.019413               | -3.022178 | -0.003076 |
| 24            | 6             | 0           | -3.853386               | -0.690958 | -1.506521 |
| 25            | 6             | 0           | -3.854165               | 0.689475  | -1.503916 |
| 26            | 6             | 0           | -2.846120               | 1.380024  | -0.809384 |
| 27            | 6             | 0           | -1.663470               | 0.701857  | -0.327277 |
| 28            | 14            | 0           | -3.021171               | 3.017140  | 0.005982  |
| 29            | 1             | 0           | -4.689115               | -1.237371 | -1.940706 |
| 30            | 1             | 0           | -4.690728               | 1.236554  | -1.935596 |
| 31            | 1             | 0           | -4.228409               | 3.166396  | 0.909210  |
| 32            | 1             | 0           | -1.236629               | 4.683396  | 1.946788  |
| 33            | 1             | 0           | 1.237273                | 4.684964  | 1.942137  |
| 34            | 1             | 0           | 3.167226                | 4.227737  | -0.903338 |
| 35            | 1             | 0           | 4.684413                | 1.237756  | -1.946285 |
| 36            | 1             | 0           | 4.686070                | -1.236151 | -1.945854 |
| 37            | 1             | 0           | 1.238530                | -4.690373 | 1.935807  |
| 38            | 1             | 0           | -1.235404               | -4.692010 | 1.935254  |
| 39            | 1             | 0           | -3.170110               | -4.229264 | -0.906275 |

|    |   |   |           |           |           |
|----|---|---|-----------|-----------|-----------|
| 40 | 1 | 0 | 4.227194  | 3.169287  | 0.898061  |
| 41 | 1 | 0 | 3.170357  | -4.227928 | -0.907548 |
| 42 | 1 | 0 | -4.227080 | -3.174502 | 0.899033  |
| 43 | 1 | 0 | -3.173302 | 4.226308  | -0.894168 |
| 44 | 1 | 0 | 4.228535  | -3.171401 | 0.896018  |

**Table S28.** The optimized Cartesian coordinates of the compound **12** in the ground singlet state calculated at the B3LYP/6-311++G(d, p) level of theory

| Center Number | Atomic Number | Atomic Type | Coordinates (Angstroms) |           |           |
|---------------|---------------|-------------|-------------------------|-----------|-----------|
|               |               |             | X                       | Y         | Z         |
| 1             | 6             | 0           | 2.227436                | 3.209884  | -1.496326 |
| 2             | 6             | 0           | 3.209884                | 2.227436  | -1.496326 |
| 3             | 6             | 0           | 2.968812                | 1.029694  | -0.837669 |
| 4             | 6             | 0           | 1.678822                | 0.679917  | -0.332546 |
| 5             | 6             | 0           | 0.679917                | 1.678822  | -0.332546 |
| 6             | 6             | 0           | 1.029694                | 2.968812  | -0.837669 |
| 7             | 14            | 0           | 0.000000                | 4.276507  | 0.000000  |
| 8             | 6             | 0           | -1.029694               | 2.968812  | 0.837669  |
| 9             | 6             | 0           | -0.679917               | 1.678822  | 0.332546  |
| 10            | 6             | 0           | -1.678822               | 0.679917  | 0.332546  |
| 11            | 6             | 0           | -2.968812               | 1.029694  | 0.837669  |
| 12            | 6             | 0           | -3.209884               | 2.227436  | 1.496326  |
| 13            | 6             | 0           | -2.227436               | 3.209884  | 1.496326  |
| 14            | 6             | 0           | -1.678822               | -0.679917 | -0.332546 |
| 15            | 6             | 0           | -2.968812               | -1.029694 | -0.837669 |
| 16            | 14            | 0           | -4.276507               | 0.000000  | 0.000000  |
| 17            | 6             | 0           | -0.679917               | -1.678822 | -0.332546 |
| 18            | 6             | 0           | -1.029694               | -2.968812 | -0.837669 |
| 19            | 6             | 0           | -2.227436               | -3.209884 | -1.496326 |
| 20            | 6             | 0           | -3.209884               | -2.227436 | -1.496326 |
| 21            | 6             | 0           | 0.679917                | -1.678822 | 0.332546  |
| 22            | 6             | 0           | 1.029694                | -2.968812 | 0.837669  |
| 23            | 14            | 0           | 0.000000                | -4.276507 | 0.000000  |
| 24            | 6             | 0           | 2.227436                | -3.209884 | 1.496326  |
| 25            | 6             | 0           | 3.209884                | -2.227436 | 1.496326  |
| 26            | 6             | 0           | 2.968812                | -1.029694 | 0.837669  |
| 27            | 6             | 0           | 1.678822                | -0.679917 | 0.332546  |
| 28            | 14            | 0           | 4.276507                | 0.000000  | 0.000000  |
| 29            | 1             | 0           | 2.441444                | -4.192324 | 1.905750  |
| 30            | 1             | 0           | 4.192324                | -2.441444 | 1.905750  |
| 31            | 1             | 0           | 5.152528                | -0.844436 | -0.855789 |
| 32            | 1             | 0           | 4.192324                | 2.441444  | -1.905750 |
| 33            | 1             | 0           | 2.441444                | 4.192324  | -1.905750 |
| 34            | 1             | 0           | 0.844436                | 5.152528  | 0.855789  |
| 35            | 1             | 0           | -2.441444               | 4.192324  | 1.905750  |
| 36            | 1             | 0           | -4.192324               | 2.441444  | 1.905750  |
| 37            | 1             | 0           | -4.192324               | -2.441444 | -1.905750 |
| 38            | 1             | 0           | -2.441444               | -4.192324 | -1.905750 |
| 39            | 1             | 0           | -0.844436               | -5.152528 | 0.855789  |
| 40            | 1             | 0           | -0.844436               | 5.152528  | -0.855789 |
| 41            | 1             | 0           | -5.152528               | -0.844436 | 0.855789  |
| 42            | 1             | 0           | 0.844436                | -5.152528 | -0.855789 |
| 43            | 1             | 0           | 5.152528                | 0.844436  | 0.855789  |
| 44            | 1             | 0           | -5.152528               | 0.844436  | -0.855789 |

**Table S29.** The optimized Cartesian coordinates of the dication **13** in the ground singlet state calculated at the B3LYP/6-311++G(d, p) level of theory

| Center Number | Atomic Number | Atomic Type | Coordinates (Angstroms) |          |           |
|---------------|---------------|-------------|-------------------------|----------|-----------|
|               |               |             | X                       | Y        | Z         |
| 1             | 6             | 0           | -1.089152               | 2.871230 | -0.956214 |
| 2             | 32            | 0           | 0.306091                | 3.746530 | -2.031964 |
| 3             | 6             | 0           | 1.541036                | 2.656071 | -0.956751 |
| 4             | 6             | 0           | 2.801318                | 2.995029 | -0.533677 |

|    |    |   |           |           |           |
|----|----|---|-----------|-----------|-----------|
| 5  | 6  | 0 | 3.410568  | 2.277305  | 0.533248  |
| 6  | 6  | 0 | 2.871140  | 1.089042  | 0.956613  |
| 7  | 6  | 0 | 1.652599  | 0.584094  | 0.379001  |
| 8  | 6  | 0 | 0.844833  | 1.535786  | -0.379015 |
| 9  | 6  | 0 | -0.584138 | 1.652635  | -0.378777 |
| 10 | 6  | 0 | -1.535743 | 0.844797  | 0.379272  |
| 11 | 6  | 0 | -2.655961 | 1.540945  | 0.957203  |
| 12 | 6  | 0 | -2.994968 | 2.801267  | 0.534287  |
| 13 | 6  | 0 | -2.277367 | 3.410618  | -0.532662 |
| 14 | 6  | 0 | -1.652591 | -0.584174 | 0.378913  |
| 15 | 6  | 0 | -2.871120 | -1.089243 | 0.956443  |
| 16 | 32 | 0 | -3.746296 | 0.305898  | 2.032425  |
| 17 | 6  | 0 | -0.844840 | -1.535708 | -0.379319 |
| 18 | 6  | 0 | -1.541055 | -2.655872 | -0.957275 |
| 19 | 6  | 0 | -2.801328 | -2.994919 | -0.534246 |
| 20 | 6  | 0 | -3.410556 | -2.277419 | 0.532841  |
| 21 | 6  | 0 | 0.584131  | -1.652555 | -0.379136 |
| 22 | 6  | 0 | 1.089134  | -2.871029 | -0.956842 |
| 23 | 32 | 0 | -0.306132 | -3.746101 | -2.032746 |
| 24 | 6  | 0 | 1.535751  | -0.844876 | 0.379063  |
| 25 | 6  | 0 | 2.655981  | -1.541146 | 0.956824  |
| 26 | 6  | 0 | 2.994980  | -2.801379 | 0.533636  |
| 27 | 6  | 0 | 2.277357  | -3.410505 | -0.533428 |
| 28 | 32 | 0 | 3.746336  | -0.306325 | 2.032286  |
| 29 | 1  | 0 | 5.246387  | -0.429033 | 1.798960  |
| 30 | 1  | 0 | 3.323853  | -0.271661 | 3.497947  |
| 31 | 1  | 0 | 3.849024  | -3.319246 | 0.956087  |
| 32 | 1  | 0 | 2.649495  | -4.337455 | -0.955695 |
| 33 | 1  | 0 | -0.428861 | -5.246179 | -1.799605 |
| 34 | 1  | 0 | -0.271331 | -3.323451 | -3.498356 |
| 35 | 1  | 0 | -3.319154 | -3.848914 | -0.956845 |
| 36 | 1  | 0 | -4.337546 | -2.649605 | 0.954977  |
| 37 | 1  | 0 | -5.246351 | 0.428655  | 1.799151  |
| 38 | 1  | 0 | -3.323789 | 0.270928  | 3.498072  |
| 39 | 1  | 0 | -3.849003 | 3.319044  | 0.956865  |
| 40 | 1  | 0 | -2.649513 | 4.337657  | -0.954725 |
| 41 | 1  | 0 | 0.428827  | 5.246558  | -1.798506 |
| 42 | 1  | 0 | 0.271257  | 3.324190  | -3.497662 |
| 43 | 1  | 0 | 3.319136  | 3.849112  | -0.956107 |
| 44 | 1  | 0 | 4.337567  | 2.649403  | 0.955442  |

**Table S30.** The optimized Cartesian coordinates of the dianion **13** in the ground singlet state calculated at the B3LYP/6-311++G(d, p) level of theory

| Center Number | Atomic Number | Atomic Type | Coordinates (Angstroms) |           |           |
|---------------|---------------|-------------|-------------------------|-----------|-----------|
|               |               |             | X                       | Y         | Z         |
| 1             | 6             | 0           | 1.350936                | 2.851235  | 0.850125  |
| 2             | 32            | 0           | 0.012348                | 3.821705  | 1.854989  |
| 3             | 6             | 0           | -1.333391               | 2.858480  | 0.852816  |
| 4             | 6             | 0           | -2.574764               | 3.322984  | 0.489031  |
| 5             | 6             | 0           | -3.308054               | 2.594688  | -0.485629 |
| 6             | 6             | 0           | -2.851163               | 1.350832  | -0.850534 |
| 7             | 6             | 0           | -1.656740               | 0.728463  | -0.311636 |
| 8             | 6             | 0           | -0.718443               | 1.660849  | 0.312494  |
| 9             | 6             | 0           | 0.728501                | 1.656767  | 0.311405  |
| 10            | 6             | 0           | 1.660810                | 0.718416  | -0.312760 |
| 11            | 6             | 0           | 2.858375                | 1.333319  | -0.853282 |
| 12            | 6             | 0           | 3.322925                | 2.574722  | -0.489658 |
| 13            | 6             | 0           | 2.594748                | 3.308094  | 0.485029  |
| 14            | 6             | 0           | 1.656728                | -0.728528 | -0.311548 |
| 15            | 6             | 0           | 2.851130                | -1.351009 | -0.850361 |
| 16            | 32            | 0           | 3.821476                | -0.012506 | -1.855458 |
| 17            | 6             | 0           | 0.718455                | -1.660783 | 0.312812  |
| 18            | 6             | 0           | 1.333424                | -2.858302 | 0.853361  |
| 19            | 6             | 0           | 2.574782                | -3.322883 | 0.489624  |
| 20            | 6             | 0           | 3.308034                | -2.594789 | -0.485216 |
| 21            | 6             | 0           | -0.728490               | -1.656701 | 0.311778  |
| 22            | 6             | 0           | -1.350904               | -2.851058 | 0.850770  |
| 23            | 32            | 0           | -0.012277               | -3.821318 | 1.855784  |
| 24            | 6             | 0           | -1.660822               | -0.718481 | -0.312547 |
| 25            | 6             | 0           | -2.858407               | -1.333496 | -0.852895 |
| 26            | 6             | 0           | -3.322942               | -2.574824 | -0.488997 |

|    |    |   |           |           |           |
|----|----|---|-----------|-----------|-----------|
| 27 | 6  | 0 | -2.594729 | -3.307994 | 0.485816  |
| 28 | 32 | 0 | -3.821547 | 0.012120  | -1.855315 |
| 29 | 1  | 0 | -5.367781 | 0.015869  | -1.689267 |
| 30 | 1  | 0 | -3.568014 | 0.013224  | -3.392550 |
| 31 | 1  | 0 | -4.252339 | -2.967574 | -0.894677 |
| 32 | 1  | 0 | -2.993071 | -4.235452 | 0.890477  |
| 33 | 1  | 0 | -0.016012 | -5.367573 | 1.689926  |
| 34 | 1  | 0 | -0.013511 | -3.567597 | 3.392988  |
| 35 | 1  | 0 | 2.967498  | -4.252230 | 0.895453  |
| 36 | 1  | 0 | 4.235527  | -2.993182 | -0.889749 |
| 37 | 1  | 0 | 5.367717  | -0.016219 | -1.689470 |
| 38 | 1  | 0 | 3.567883  | -0.013928 | -3.392683 |
| 39 | 1  | 0 | 4.252307  | 2.967387  | -0.895455 |
| 40 | 1  | 0 | 2.993106  | 4.235638  | 0.889481  |
| 41 | 1  | 0 | 0.016076  | 5.367925  | 1.688812  |
| 42 | 1  | 0 | 0.013640  | 3.568300  | 3.392245  |
| 43 | 1  | 0 | -2.967463 | 4.252417  | 0.894680  |
| 44 | 1  | 0 | -4.235563 | 2.992995  | -0.890208 |

**Table S31.** The optimized Cartesian coordinates of the compound **13** in the ground singlet state calculated at the B3LYP/6-311++G(d, p) level of theory

| Center Number | Atomic Number | Atomic Type | Coordinates (Angstroms) |           |           |
|---------------|---------------|-------------|-------------------------|-----------|-----------|
|               |               |             | X                       | Y         | Z         |
| 1             | 6             | 0           | -2.784875               | 1.368383  | -0.910224 |
| 2             | 32            | 0           | -3.064761               | 3.065697  | -0.002151 |
| 3             | 6             | 0           | -1.368726               | 2.785401  | 0.908489  |
| 4             | 6             | 0           | -0.695983               | 3.773380  | 1.611313  |
| 5             | 6             | 0           | 0.694737                | 3.772942  | 1.612453  |
| 6             | 6             | 0           | 1.368407                | 2.784745  | 0.910589  |
| 7             | 6             | 0           | 0.707546                | 1.649070  | 0.359673  |
| 8             | 6             | 0           | -0.707337               | 1.649311  | 0.358964  |
| 9             | 6             | 0           | -1.649120               | 0.707536  | -0.359455 |
| 10            | 6             | 0           | -1.649362               | -0.707347 | -0.358708 |
| 11            | 6             | 0           | -2.785532               | -1.368750 | -0.908052 |
| 12            | 6             | 0           | -3.773612               | -0.696025 | -1.610752 |
| 13            | 6             | 0           | -3.773173               | 0.694695  | -1.611929 |
| 14            | 6             | 0           | -0.707483               | -1.649112 | 0.359599  |
| 15            | 6             | 0           | -1.368250               | -2.784853 | 0.910493  |
| 16            | 32            | 0           | -3.065698               | -3.064759 | 0.002676  |
| 17            | 6             | 0           | 0.707400                | -1.649353 | 0.358651  |
| 18            | 6             | 0           | 1.368882                | -2.785507 | 0.907930  |
| 19            | 6             | 0           | 0.696258                | -3.773569 | 1.610751  |
| 20            | 6             | 0           | -0.694462               | -3.773132 | 1.612127  |
| 21            | 6             | 0           | 1.649060                | -0.707492 | -0.359817 |
| 22            | 6             | 0           | 2.784720                | -1.368275 | -0.910859 |
| 23            | 32            | 0           | 3.064758                | -3.065699 | -0.003039 |
| 24            | 6             | 0           | 1.649302                | 0.707390  | -0.358905 |
| 25            | 6             | 0           | 2.785378                | 1.368857  | -0.908365 |
| 26            | 6             | 0           | 3.773338                | 0.696215  | -1.611312 |
| 27            | 6             | 0           | 3.772900                | -0.694505 | -1.612652 |
| 28            | 32            | 0           | 3.065698                | 3.064760  | 0.002513  |
| 29            | 1             | 0           | 3.033002                | 4.362096  | -0.823059 |
| 30            | 1             | 0           | 4.361415                | 3.029977  | 0.830411  |
| 31            | 1             | 0           | 4.603055                | 1.239069  | -2.052735 |
| 32            | 1             | 0           | 4.602345                | -1.236900 | -2.055136 |
| 33            | 1             | 0           | 4.362118                | -3.033128 | 0.822499  |
| 34            | 1             | 0           | 3.029944                | -4.361294 | -0.831126 |
| 35            | 1             | 0           | 1.239124                | -4.603348 | 2.052042  |
| 36            | 1             | 0           | -1.236845               | -4.602642 | 2.054504  |
| 37            | 1             | 0           | -3.033147               | -4.361997 | -0.823056 |
| 38            | 1             | 0           | -4.361271               | -3.030069 | 0.830803  |
| 39            | 1             | 0           | -4.603403               | -1.238827 | -2.052098 |
| 40            | 1             | 0           | -4.602695               | 1.237141  | -2.054207 |
| 41            | 1             | 0           | -4.361975               | 3.033019  | 0.823612  |
| 42            | 1             | 0           | -3.030100               | 4.361394  | -0.830084 |
| 43            | 1             | 0           | -1.238774               | 4.603107  | 2.052794  |
| 44            | 1             | 0           | 1.237195                | 4.602400  | 2.054836  |
